# Supplementary material for: Quantum Artificial Neural Network Approach to Derive a Highly Predictive 3D-QSAR Model for Blood–Brain Barrier Passage
Source: MDPI journal article supplement (doi:10.3390/ijms222010995), 2021-10-12
Supplement: s1 [file s1]

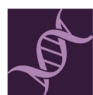

*Supplementary Material*

# Quantum Artificial Neural Network Approach to Derive a Highly Predictive 3D-QSAR Model for Blood–Brain Barrier Passage

Taeho Kim,<sup>1</sup> Byoung Hoon You,<sup>2</sup> Songhee Han,<sup>2</sup> Ho Chul Shin,<sup>2</sup> Kee-Choo Chung,<sup>1,\*</sup> Hwangseo Park<sup>1,\*</sup>

<sup>1</sup> Department of Bioscience and Biotechnology, Sejong University, 209 Neungdong-ro, Kwangjin-gu, Seoul 05006, Korea

<sup>2</sup> Whan In Pharmaceutical Co., Ltd., 11, Beobwon-ro 6-gil, Songpa-gu, Seoul 05855, Korea

\* Correspondence: Tel: +82-2-10-2963-1635 (KCC); +82-2-3408-3766 (HP); Fax: +82-2-3408-4334 (KCC); +82-2-3408-4334 (HP); E-mail: kitto28@paran.com (KCC); hspark@sejong.ac.kr (HP)

## Supplementary Material

Chemical structures, molecular weights, S2-S60, S61-S84  
LogBB values, and PubChem CID of all the  
molecules in the dataset.

Linear diagrams showing correlation between the experimental and calculated LogBB values of Subset 1-8 molecules in the 3-fold external cross-validation.

**Table S1.** Chemical structures, molecular weights, experimental LogBB values, and PubChem CID of all the molecules in the dataset.

| Structure                                                                           | Molecular weight | LogBB | PubChem CID |
|-------------------------------------------------------------------------------------|------------------|-------|-------------|
|    | 200.053          | 0.3   | 5206        |
|    | 202.255          | 0.23  | 31423       |
|   | 203.2864         | -1.39 | 12032949    |
|  | 204.234          | -1.17 | 12889418    |
|  | 204.2892         | -1.3  | 1497794     |
|  | 206.2187         | -0.05 | 94957       |

|                                                                                     |          |       |           |
|-------------------------------------------------------------------------------------|----------|-------|-----------|
| 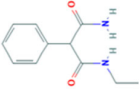   | 206.2438 | -0.19 | 118753220 |
|    | 206.284  | -0.18 | 3672      |
|    | 208.2164 | -0.22 | 5842      |
|  | 208.3208 | 0.03  | 3034183   |
|  | 209.6749 | -0.65 | 72138     |
|  | 209.6749 | -0.87 | 77870     |
|  | 211.22   | -1.18 | 24066     |

|                                                                                     |          |       |          |
|-------------------------------------------------------------------------------------|----------|-------|----------|
| 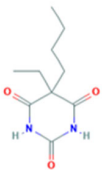   | 212.248  | 0.19  | 6473     |
|    | 213.6603 | -1.52 | 2284     |
|    | 214.045  | -0.52 | 2578     |
|  | 217.1529 | -0.41 | 9837317  |
|  | 217.3132 | -1.3  | 21675832 |
|  | 218.2522 | -0.15 | 4064     |

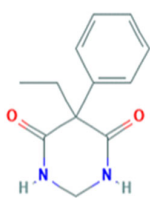

218.2548

-0.07

4909

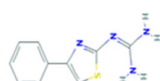

218.2758

-0.18

3763607

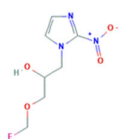

219.1717

-0.01

23274095

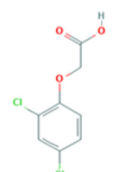

221.0336

0.15

1486

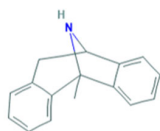

221.3012

1.11

1207

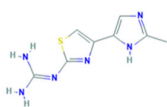

222.2672

-0.04

56051

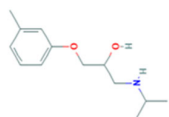

223.3144

0.34

18047

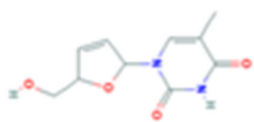

224.2158

-0.48

5155

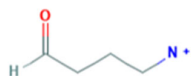

225.2066

-0.84

2022

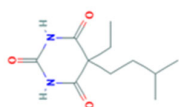

226.2748

0.11

2164

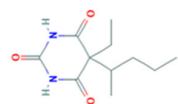

226.2748

0.08

4737

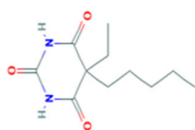

226.2748

0.09

66994

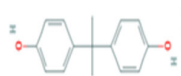

228.2902

-0.12

6623

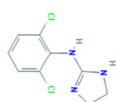

230.0902

0.12

2803

|                                                                                     |          |       |          |
|-------------------------------------------------------------------------------------|----------|-------|----------|
| 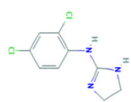   | 230.0902 | 0.16  | 90274    |
|    | 230.0902 | 0.38  | 11777724 |
|    | 230.0902 | 0.11  | 13071367 |
|   | 230.0902 | 0.11  | 44214615 |
|  | 230.2628 | 0.1   | 156391   |
|  | 231.2968 | 0     | 6009     |
|  | 232.2384 | -0.66 | 4421     |
|  | 232.2384 | 0.12  | 4763     |

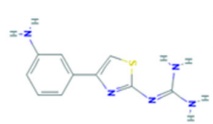

233.2904

-1.15

14022509

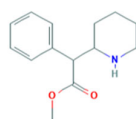

233.3096

0.88

4158

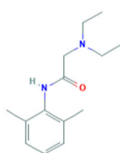

234.3406

0.34

3676

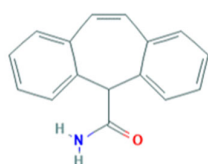

235.2848

0

25255

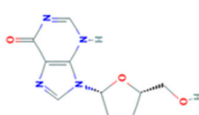

236.2298

-1.301

50599

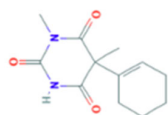

236.27

0.03

3608

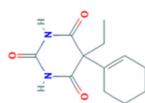

236.27

-0.301

5838



|                                                                                     |          |       |         |
|-------------------------------------------------------------------------------------|----------|-------|---------|
| 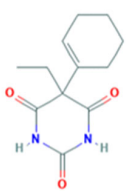   | 236.2726 | -0.04 | 2554    |
|    | 236.3132 | 0.05  | 4914    |
|    | 238.1592 | -2.09 | 6604200 |
|  | 238.2858 | 0.2   | 5193    |
|  | 239.3138 | -1.14 | 2083    |
|  | 239.7413 | 1.4   | 444     |
|  | 240.3016 | 0.36  | 8942    |

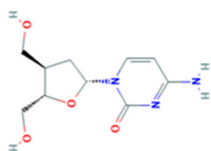

241.2462

-0.79

451819

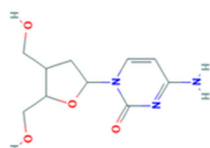

241.2462

-0.79

14840722

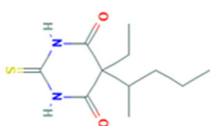

242.3354

-0.19

3000715

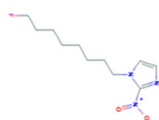

243.2801

-0.17

10377120

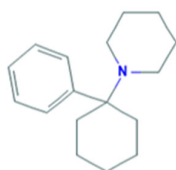

243.3912

0.58

6468

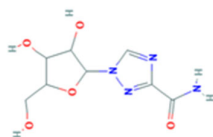

244.2066

-0.67

5064

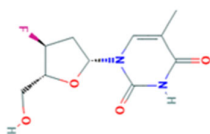

244.2217

-0.59

33039

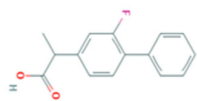

244.2645

-1.68

3394

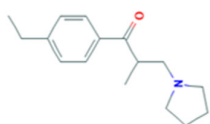

245.3638

1.08

65860

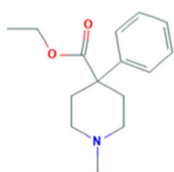

247.3364

0.85

4058

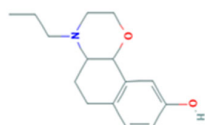

247.3364

0.26

10060538

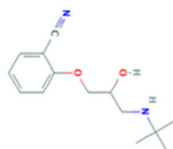

248.3242

0.38

2473

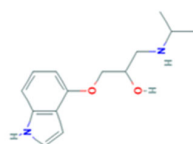

248.3242

-0.14

4828

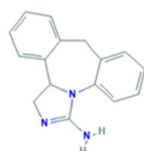

249.3146

-0.16

3241

249.3522

-0.23

2119

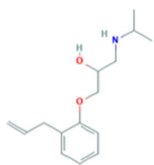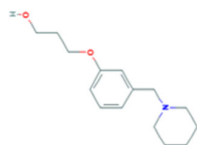

249.3522

-0.02

10444765

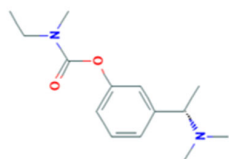

250.34

0.88

77991

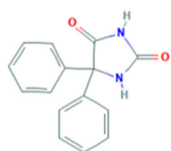

252.272

-0.05

1775

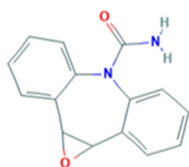

252.272

-0.34

2555

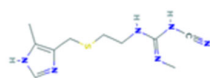

252.3366

-1.06

2756

|                                                                                     |          |       |         |
|-------------------------------------------------------------------------------------|----------|-------|---------|
| 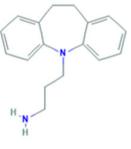   | 252.3584 | 1.05  | 159642  |
|    | 254.2416 | -0.15 | 5281708 |
|    | 254.3284 | 0.02  | 43473   |
|   | 255.359  | 1.26  | 3100    |
|  | 256.0878 | 0.29  | 3878    |
|  | 257.3748 | 0     | 3918    |
|  | 257.3748 | 0     | 5359272 |
|  | 259.3474 | 0.84  | 4946    |

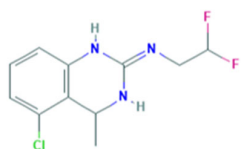

259.6819

0.6

135458393

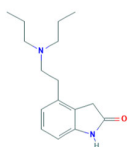

260.3784

0.08

5095

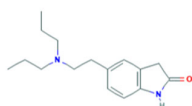

260.3784

0.25

44383796

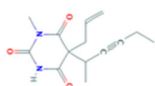

262.3078

-0.07

9034

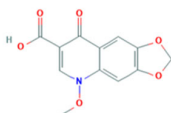

263.2062

-0.92

37614

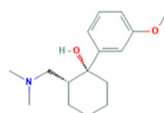

263.379

0.72

33741

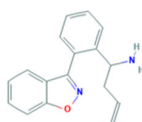

264.3262

0

9861160

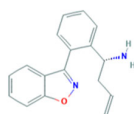

264.3262

0

15524033

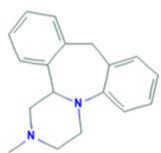

264.3694

0.99

4184

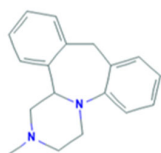

264.3694

0.99

4184

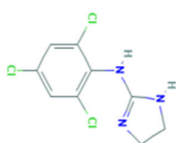

264.5323

0.47

10470115

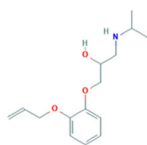

265.3516

0.02

4631

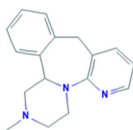

265.3572

0.53

4205

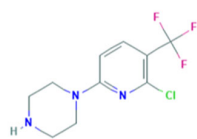

265.661

1.64

9796408

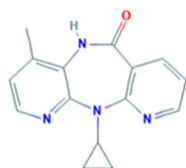

266.3018

0

4463

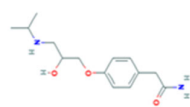

266.3394

-1.14

2249

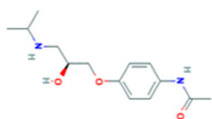

266.3394

-0.55

443371

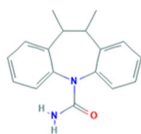

266.342

-0.34

70517986

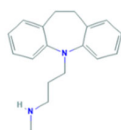

266.3852

1.08

2995

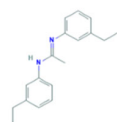

266.3852

1.2

19427054

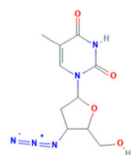

267.2438

-0.74

5726

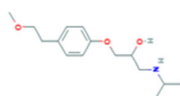

267.3674

1.15

4171



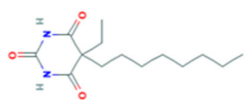

268.3552

0.24

13755681

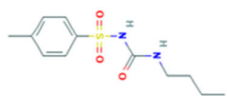

270.3458

-1.01

5505

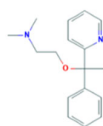

270.3736

0.64

3162

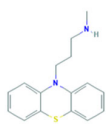

270.3916

0.59

28315

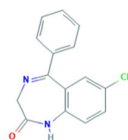

270.7147

0.52

2997

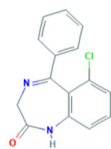

270.7147

0.5

14590445

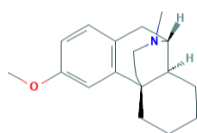

271.4016

0.22

6916184

271.7427

0.39

14577084

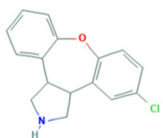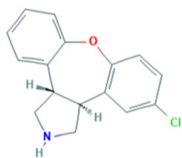

271.7427

0.39

44568616

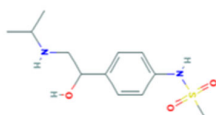

272.3616

-0.28

5253

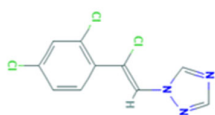

274.5275

0.28

3034012

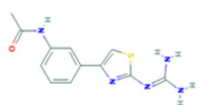

275.3276

-1.57

14022511

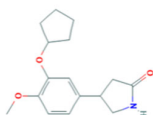

275.3468

0.61

5092

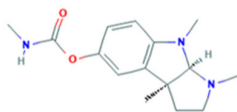

275.3498

0.08

5983

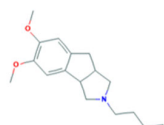

275.39

0.31

6086

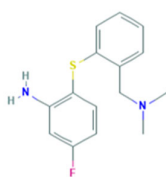

276.3707

0.2

10265481

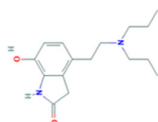

276.3778

-0.43

133741

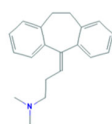

277.4084

0.9

2160

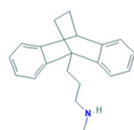

277.4084

1.3

4011

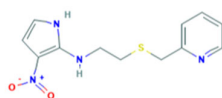

278.3282

-0.66

14022481

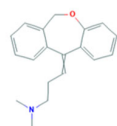

279.381

1

3158

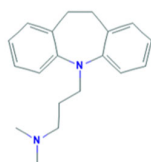

280.412

0.98

3696

281.3536

0.52

22154175

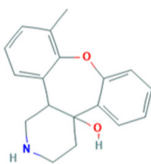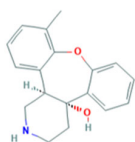

281.3536

0.52

44568615

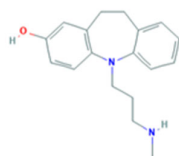

282.3846

0.53

121249

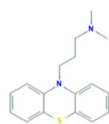

284.4184

1.08

4926

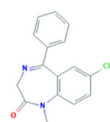

284.7415

0.47

3016

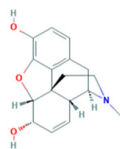

285.342

-0.26

5288826

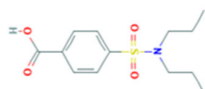

285.3574

-0.4

4911

|                                                                                     |          |       |        |
|-------------------------------------------------------------------------------------|----------|-------|--------|
| 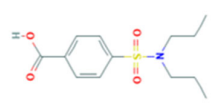   | 285.3574 | -0.4  | 4911   |
|    | 285.3882 | 0.49  | 4992   |
|    | 285.4284 | 0.51  | 4736   |
|   | 285.7695 | 1.03  | 163091 |
|  | 286.7141 | 0.35  | 89657  |
|  | 287.3578 | -1.42 | 3308   |
|  | 287.3578 | 0.32  | 9651   |

|                                                                                     |          |       |         |
|-------------------------------------------------------------------------------------|----------|-------|---------|
| 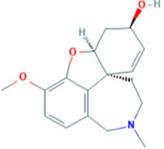   | 287.3578 | 0.32  | 9651    |
|    | 288.429  | 0     | 6013    |
|    | 289.3736 | -0.06 | 174174  |
|   | 290.3765 | -0.3  | 67101   |
|  | 290.4046 | -0.46 | 9971484 |
|  | 290.8069 | 0.97  | 74981   |
|  | 291.4352 | 0.08  | 5402    |

|                                                                                     |          |       |         |
|-------------------------------------------------------------------------------------|----------|-------|---------|
| 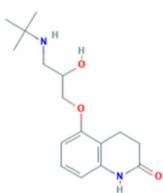   | 292.3772 | 0.01  | 2583    |
|    | 292.4414 | -0.17 | 3035905 |
|    | 293.3676 | 0.28  | 4595    |
|   | 293.451  | 0.66  | 68778   |
|  | 293.7463 | -0.95 | 197322  |
|  | 294.3524 | -0.09 | 9839073 |
|  | 294.4388 | 0.99  | 5584    |

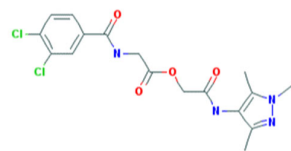

295.3372

-0.34

29939457

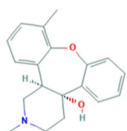

295.3804

0.82

166560

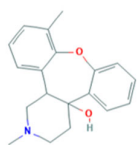

295.3804

0.82

9860946

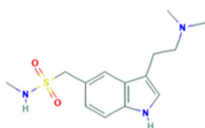

295.3988

-0.4

5358

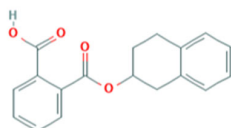

296.322

0.09

346516

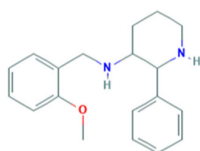

296.4114

0.87

18435769

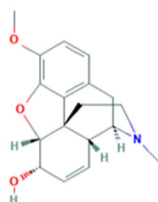

299.3688

0.45

5284371

299.7967

0.9

4168



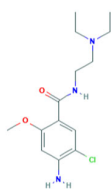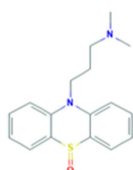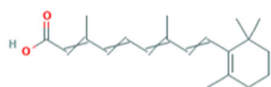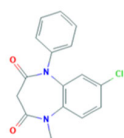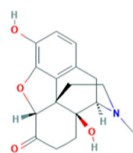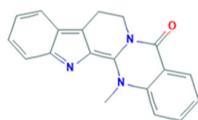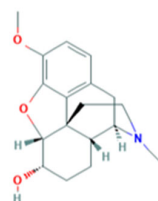

300.4178

-0.48

547559

300.44

-0.49

5538

300.7409

0.36

2789

301.3414

0.35

5284604

301.347

0.11

9817839

301.3846

0.55

5284543

302.2398

-1.7

5280343

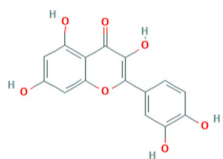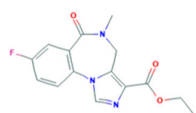

303.2919

-0.29

3373

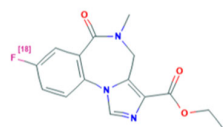

303.2919

-0.095

11652375

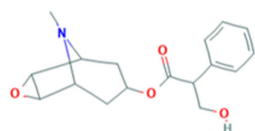

303.3572

0.23

5184

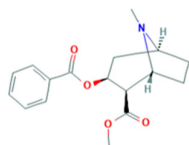

303.3572

0.6

446220

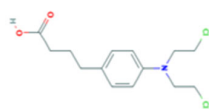

304.2096

-1.7

2708

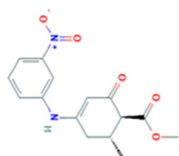

304.3018

-1

10063598

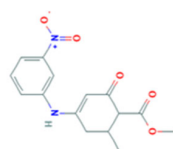

304.3018

-1

15186924

|                                                                                     |          |       |          |
|-------------------------------------------------------------------------------------|----------|-------|----------|
| 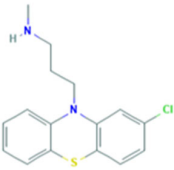   | 304.8337 | 1.38  | 62875    |
|    | 305.1974 | -0.5  | 460612   |
|    | 306.228  | 1.6   | 68617    |
|   | 306.2734 | -0.22 | 3365     |
|  | 307.3944 | -0.48 | 5732     |
|  | 307.3944 | 0.36  | 57395287 |
|  | 307.432  | 0.39  | 2369     |
|  | 308.333  | 0     | 54678486 |

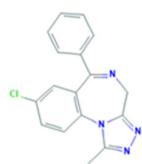

308.3792

-0.52

4781

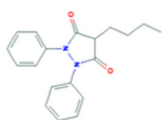

308.7665

0.02

2118

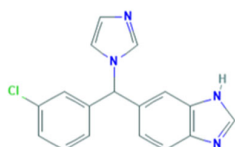

308.7665

-1

60652

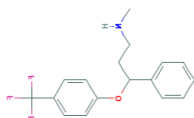

309.3293

0.72

3386

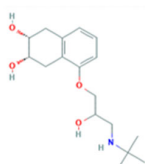

309.4046

-0.95

39147

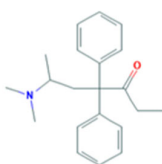

309.4504

0.9

4095

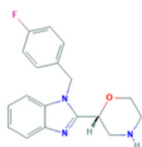

311.3577

0.77

57402315

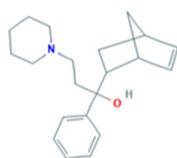

311.4662

0.85

2381

|                                                                                     |          |       |           |
|-------------------------------------------------------------------------------------|----------|-------|-----------|
| 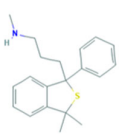   | 311.4842 | 0.22  | 33014     |
|    | 312.41   | -0.82 | 50287     |
|    | 312.4138 | -0.69 | 3510      |
|    | 312.4318 | 0.78  | 25144104  |
|  | 312.4318 | 0.78  | 135398745 |
|  | 312.451  | 0.4   | 444008    |
|  | 313.2871 | 0.07  | 3380      |
|  | 313.7803 | -0.22 | 216236    |

|                                                                                     |          |       |          |
|-------------------------------------------------------------------------------------|----------|-------|----------|
| 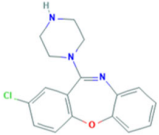   | 313.7829 | 0.6   | 2170     |
|    | 314.3552 | -0.1  | 5090     |
|    | 314.3672 | -1.54 | 14022519 |
|   | 314.4018 | -1.23 | 54429646 |
|  | 314.4668 | -0.1  | 5994     |
|  | 314.4668 | 0     | 16078    |
|  | 314.4878 | 0.3   | 47811    |
|  | 315.3682 | 0.57  | 5284603  |

|                                                                                     |          |       |          |
|-------------------------------------------------------------------------------------|----------|-------|----------|
| 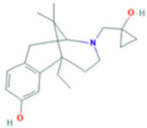   | 315.4546 | 0.6   | 1223     |
|    | 316.3741 | 0.58  | 10358392 |
|    | 318.3371 | 0.79  | 5324346  |
|   | 318.3748 | -1.4  | 60949    |
|  | 318.8605 | 1.02  | 2726     |
|  | 319.3345 | -1.15 | 4539     |
|  | 319.3776 | -0.25 | 127382   |

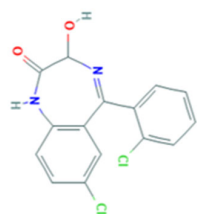

321.1562

0.44

3958

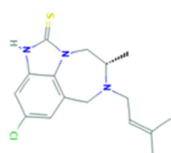

321.8641

0.28

3000237

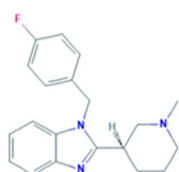

323.4119

0.43

46888857

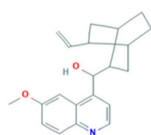

323.434

0.1

5009

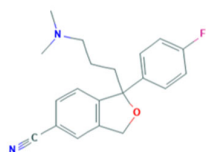

324.3967

0.99

2771

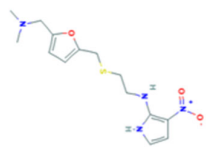

324.397

-1.12

13646638

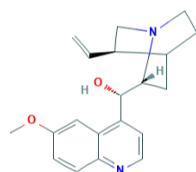

324.4218

-0.21

5953



|                                                                                     |          |       |          |
|-------------------------------------------------------------------------------------|----------|-------|----------|
| 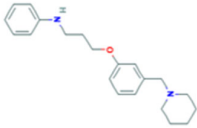   | 324.465  | 0.69  | 10245719 |
|    | 324.7659 | -1.28 | 162244   |
|    | 324.7659 | -1.48 | 182017   |
|   | 325.4528 | 0.69  | 10019237 |
|  | 325.7688 | 0.37  | 4192     |
|  | 326.3542 | -0.27 | 14022491 |
|  | 326.8249 | 0.64  | 10404144 |

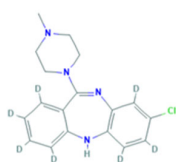

326.8249

1.3

46842852

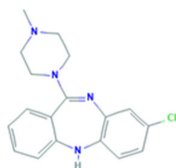

326.8249

0.7

135398737

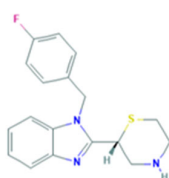

327.4183

0.89

57397056

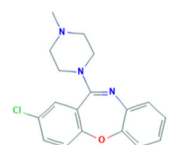

327.8097

0.8

3964

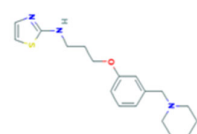

331.475

0.44

14022497

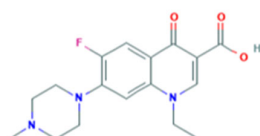

333.3613

-0.16

51081

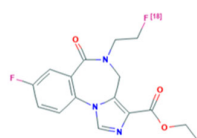

335.3088

-0.14

126761

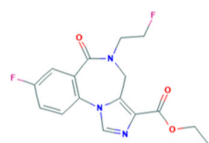

335.3088

-0.14

6426759

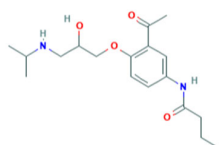

336.4302

-0.15

1978

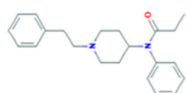

336.476

0.59

3345

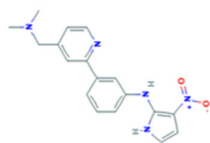

337.3804

-0.28

14022486

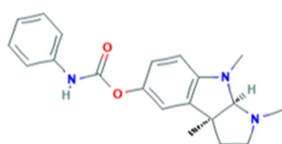

337.4206

1

192706

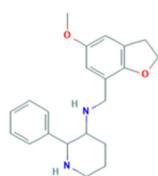

338.4486

0.39

44213642

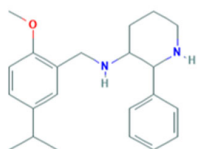

338.4918

0.92

9902443

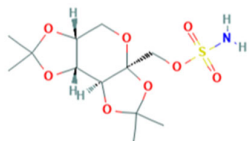

339.3598

-0.07

5284627

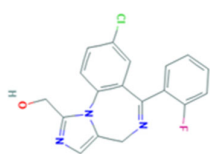

341.7682

-0.08

107917

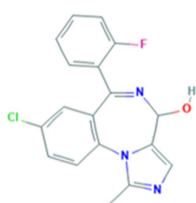

341.7682

-0.22

124449

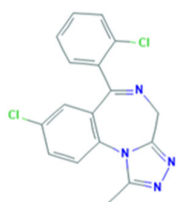

343.2086

0.67

5556

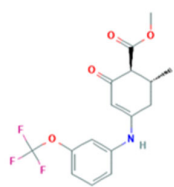

343.3007

-0.17

10088796

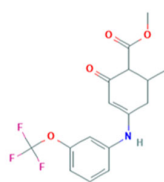

343.3007

-0.17

15186911

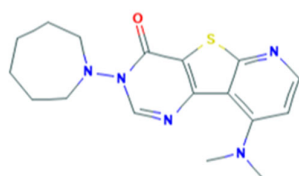

343.4458

0.43

11559235

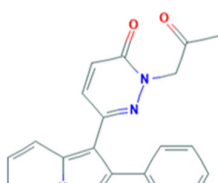

|                                                                                     |          |       |          |
|-------------------------------------------------------------------------------------|----------|-------|----------|
|                                                                                     | 344.372  | -0.31 | 11110698 |
| 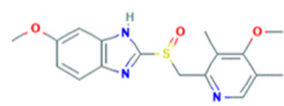   | 345.4154 | -0.82 | 4594     |
|    | 346.4656 | -0.5  | 256277   |
|   | 348.3574 | -0.29 | 24360    |
|  | 350.4374 | -0.47 | 11530404 |
|  | 351.4474 | 0.49  | 22620080 |
|  | 352.4155 | 1.44  | 5568     |

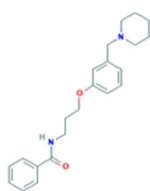

352.4754

-0.24

10498206

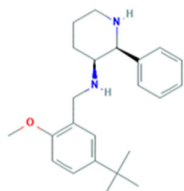

352.5186

0.98

44433393

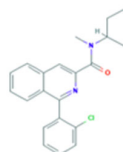

352.8597

0.48

1345

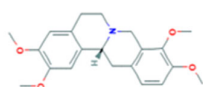

355.4328

-0.07

969488

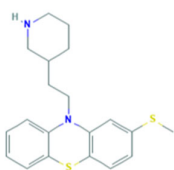

356.543

0.76

114376

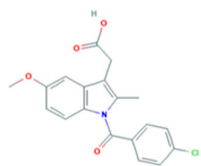

357.7897

-1.26

3715

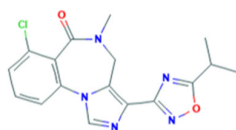

357.7957

-0.3

129710

|                                                                                     |          |       |          |
|-------------------------------------------------------------------------------------|----------|-------|----------|
| 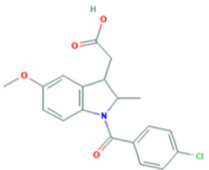   | 359.8055 | -1.26 | 53394319 |
|    | 360.3168 | 1     | 83909    |
|    | 360.4146 | -0.23 | 10937291 |
|   | 360.4492 | -0.18 | 5755     |
|  | 361.3717 | -0.76 | 149096   |
|  | 362.4485 | 0.68  | 204104   |
|  | 362.465  | -0.22 | 5754     |

|                                                                                     |          |       |          |
|-------------------------------------------------------------------------------------|----------|-------|----------|
| 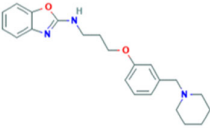   | 365.4742 | 0.22  | 14022499 |
|    | 366.3379 | -1    | 5362391  |
|    | 367.508  | 0.48  | 22620050 |
|   | 367.8717 | -0.1  | 3052762  |
|  | 368.4526 | -0.12 | 14022483 |
|  | 369.3415 | -0.43 | 3357     |
|  | 370.4157 | 0.16  | 9907401  |



|                                                                                     |          |       |          |
|-------------------------------------------------------------------------------------|----------|-------|----------|
| 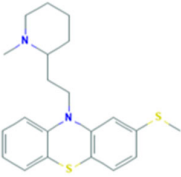   | 370.5698 | 0.26  | 5452     |
|    | 371.5212 | 0.92  | 2733526  |
|    | 371.8657 | 0.3   | 5533     |
|   | 373.4134 | -1    | 11003252 |
|  | 373.7951 | -1.34 | 10384745 |
|  | 374.497  | -0.15 | 19696721 |
|  | 374.9065 | 0.36  | 3658     |

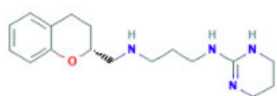

375.3344

-0.01

9907628

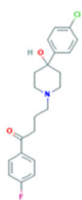

375.8662

1.33

3559

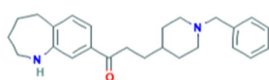

376.5406

1.14

198752

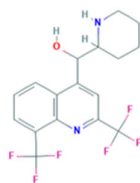

378.3142

0.63

4046

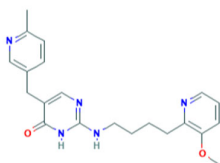

379.4608

-2

72108

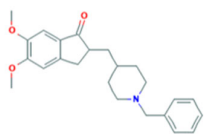

379.498

0.89

3152

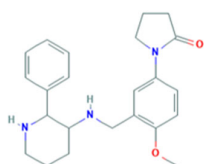

379.501

-0.22

22620062

|                                                                                     |          |      |          |
|-------------------------------------------------------------------------------------|----------|------|----------|
| 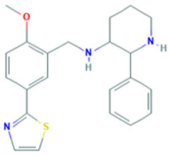   | 379.519  | 0.36 | 9907851  |
|    | 380.4054 | -1.4 | 9864646  |
|    | 380.4079 | 1.11 | 9821217  |
|   | 380.4079 | 0.63 | 9864647  |
|  | 380.4456 | 0.57 | 11531010 |
|  | 380.4884 | 0.3  | 3946663  |
|  | 380.4884 | 0.3  | 6604009  |

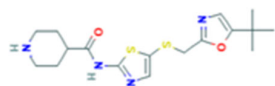

380.5222

-0.01

3025986

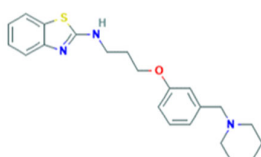

381.5348

0.14

91769

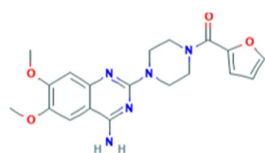

383.406

-0.9

4893

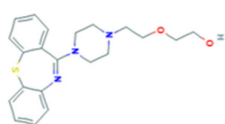

383.5074

0.7

5002

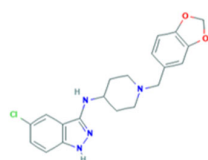

384.8615

0.83

11653882

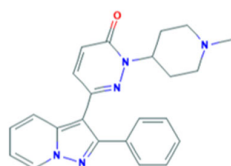

385.4676

0.06

9821511

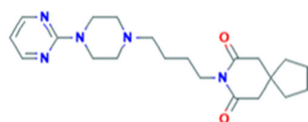

385.5082

0.49

2477

|                                                                                     |          |       |          |
|-------------------------------------------------------------------------------------|----------|-------|----------|
| 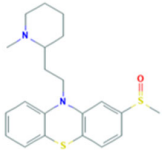   | 386.5692 | -0.28 | 4078     |
|    | 388.8901 | -2.15 | 2678     |
|    | 389.4741 | 0.32  | 45272895 |
|   | 389.7945 | -1.82 | 10091748 |
|  | 390.5272 | 0.11  | 22620075 |
|  | 391.5552 | -0.13 | 11502034 |
|  | 392.4038 | 0.41  | 60464    |

|                                                                                     |          |       |          |
|-------------------------------------------------------------------------------------|----------|-------|----------|
| 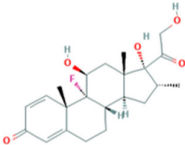   | 392.4661 | -0.15 | 5743     |
|    | 393.5458 | 0.62  | 22620085 |
|    | 394.8969 | 0.13  | 11545677 |
|   | 395.4753 | 0.26  | 5265     |
|  | 398.3924 | -2.69 | 5339     |
|  | 399.4426 | -0.8  | 6167     |
|  | 399.4944 | 0.38  | 10884606 |

|                                                                                     |          |      |          |
|-------------------------------------------------------------------------------------|----------|------|----------|
| 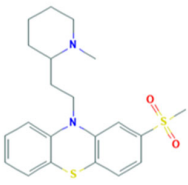   | 402.5686 | 0.18 | 31765    |
|    | 403.9659 | 0.7  | 4748     |
|    | 404.5454 | 0.85 | 53232    |
|   | 405.4398 | 0.57 | 71301    |
|  | 406.4889 | 0.96 | 9909299  |
|  | 406.5069 | 1.44 | 21440942 |
|  | 407.4947 | 1.43 | 5566     |

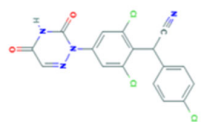

407.6337

-1.3

456389

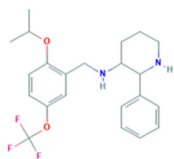

408.4615

0.41

9866153

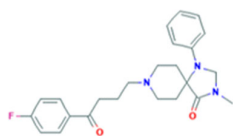

409.5021

0.46

119146

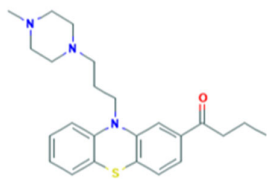

409.5884

0.83

12598

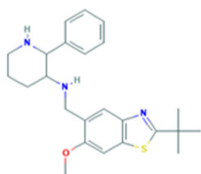

409.5884

0.85

22620091

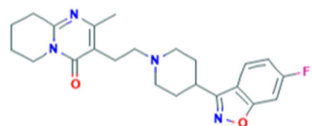

410.4899

-0.02

5073

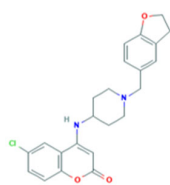

410.8963

-0.14

11531660



|                                                                                     |          |       |          |
|-------------------------------------------------------------------------------------|----------|-------|----------|
| 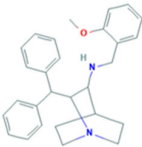   | 412.5736 | 0.37  | 9931510  |
|    | 413.5366 | -1.06 | 51671    |
|    | 413.5366 | -1.06 | 4375468  |
|   | 414.5184 | 0.3   | 39186    |
|  | 414.5214 | -0.73 | 14022484 |
|  | 415.4631 | -0.45 | 57347    |
|  | 415.5243 | 0.78  | 59823    |

|                                                                                     |          |       |          |
|-------------------------------------------------------------------------------------|----------|-------|----------|
| 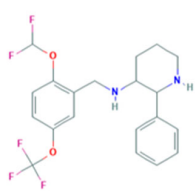   | 416.3881 | 0.88  | 10201984 |
|    | 416.5222 | -0.74 | 51263    |
|    | 418.4456 | 0.08  | 4497     |
|  | 420.5253 | -0.7  | 54385    |
|  | 421.4518 | -0.42 | 60700    |
|  | 423.5289 | -0.01 | 13497176 |
|  | 425.9139 | -0.85 | 3151     |

|                                                                                     |          |       |          |
|-------------------------------------------------------------------------------------|----------|-------|----------|
| 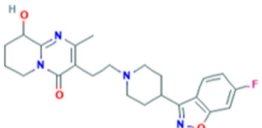   | 426.4893 | -0.67 | 115237   |
|    | 426.4893 | -0.67 | 475100   |
|    | 426.5572 | -0.62 | 444031   |
|   | 429.5762 | -0.42 | 19696654 |
|  | 429.5788 | 1.26  | 22620066 |
|  | 432.383  | 0.548 | 5316673  |
|  | 433.5144 | 0.59  | 65998    |

|                                                                                     |          |       |          |
|-------------------------------------------------------------------------------------|----------|-------|----------|
| 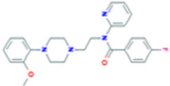   | 434.5119 | 0.09  | 6603915  |
|    | 437.5209 | 1.51  | 3372     |
|    | 437.5778 | 0.74  | 10388384 |
|   | 437.5989 | 0.48  | 44592215 |
|  | 440.5814 | -0.64 | 104972   |
|  | 441.5496 | -0.8  | 44416780 |
|  | 444.5226 | -0.89 | 9846311  |

|                                                                                     |          |       |          |
|-------------------------------------------------------------------------------------|----------|-------|----------|
| 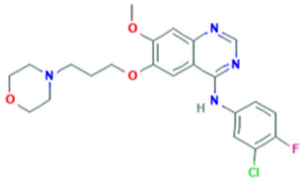   | 446.9046 | -0.5  | 123631   |
|    | 448.5818 | -1.3  | 14022522 |
|    | 449.3903 | 0.15  | 441667   |
|   | 452.9801 | -0.82 | 64761    |
|  | 453.5828 | -0.59 | 70691333 |
|  | 454.4444 | -1.51 | 4112     |
|  | 454.5706 | -0.2  | 11775399 |

|                                                                                     |          |       |          |
|-------------------------------------------------------------------------------------|----------|-------|----------|
| 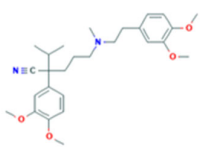   | 454.6082 | -0.64 | 2520     |
|    | 454.654  | 0.48  | 6426143  |
|    | 456.5269 | 0.3   | 9916104  |
|  | 456.5616 | -1.52 | 5625     |
|  | 457.4822 | -0.52 | 54675783 |
|  | 458.5771 | 1.1   | 2247     |
|  | 459.5563 | -1.3  | 446156   |

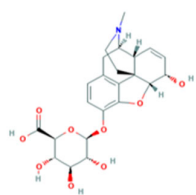

461.4676

-2.15

5484731

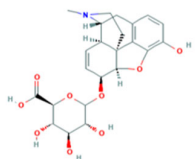

461.4676

-2.09

9847115

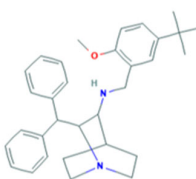

468.6808

0.46

17905241

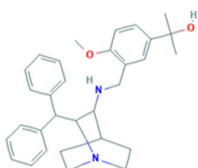

470.6534

-0.89

6426129

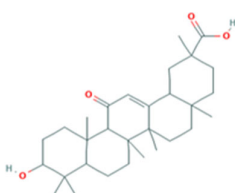

470.691

-1.4

3230

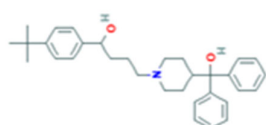

471.6814

0.64

5405

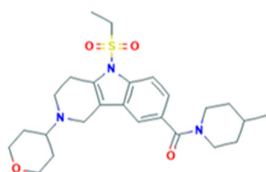

473.6292

-1.15

24894028

|                                                                                     |          |       |          |
|-------------------------------------------------------------------------------------|----------|-------|----------|
| 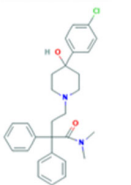   | 477.0419 | 0.77  | 3955     |
|    | 481.9929 | 0.78  | 9826520  |
|    | 488.0403 | -0.04 | 10028436 |
|  | 488.6716 | 0.81  | 73226213 |
|  | 494.0013 | -0.9  | 3488     |
|  | 497.5006 | 0     | 42890    |
|  | 500.6728 | -0.37 | 19696689 |



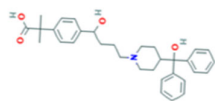

501.6644

-0.98

3348

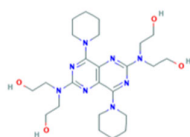

504.6312

0

3108

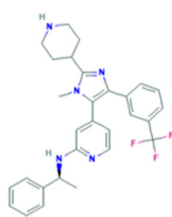

505.5835

0.01

9806182

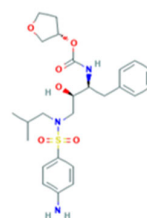

505.628

-0.56

65016

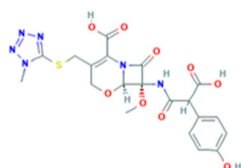

520.4728

-2.52

47499

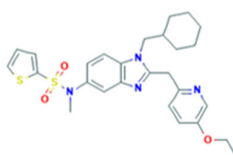

524.6948

-1.15

57390958

531.4316

-0.63

3823

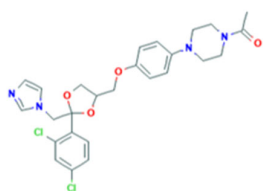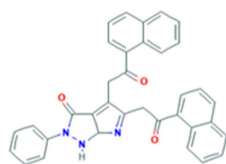

535.6008

0.02

343473

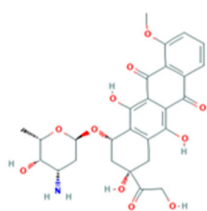

543.5262

-0.83

31703

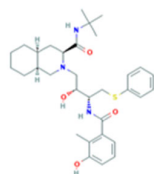

567.7852

-0.93

64143

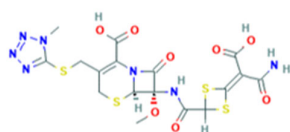

575.6034

-1.89

53025

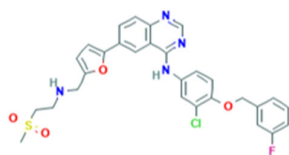

581.0568

-0.03

208908

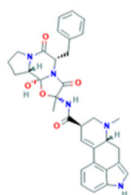

581.67

-1.1

8223

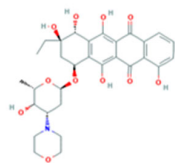

585.6066

0.56

6917994

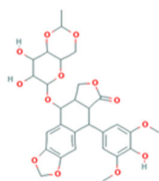

588.564

-2

3310

**Figure S1.** Linear diagram showing correlation between the experimental and calculated LogBB values of the Subset 1 molecules in the training (black) and the test set (red).

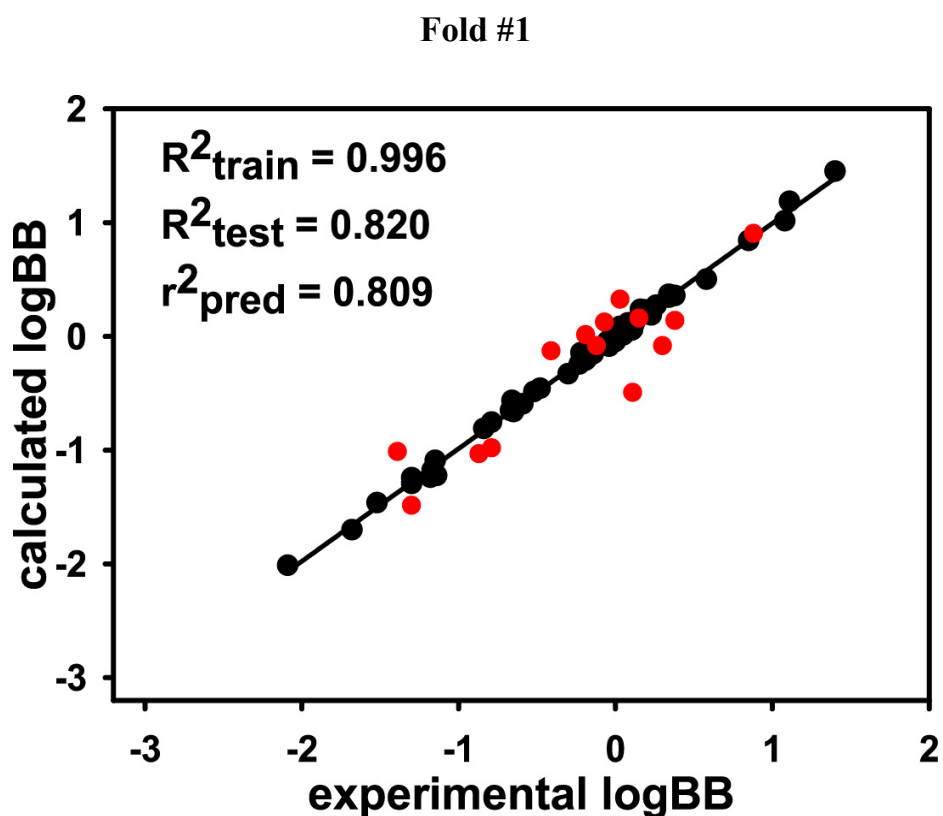

**Compounds in the training set:** 444, 1207, 2022, 2083, 2119, 2164, 2284, 2554, 2578, 2803, 3241, 3394, 3672, 3676, 4058, 4064, 4421, 4737, 4763, 4828, 4914, 5064, 5155, 5193, 5838, 5842, 6009, 6468, 6473, 8942, 18047, 24066, 25255, 31423, 33039, 56051, 65860, 66994, 72138, 90274, 94957, 156391, 451819, 1497794, 3034183, 3763607, 6604200, 10060538, 10377120, 10444765, 11777724, 12889418, 13071367, 14022509, 21675832, 23274095, 118753220.

**Compounds in the test set:** 1486, 2473, 3608, 4158, 4909, 5206, 6623, 50599, 77870, 3000715, 9837317, 12032949, 14840722, 44214615.

**Figure S2.** Linear diagram showing correlation between the experimental and calculated LogBB values of the Subset 1 molecules in the training (black) and the test set (red).

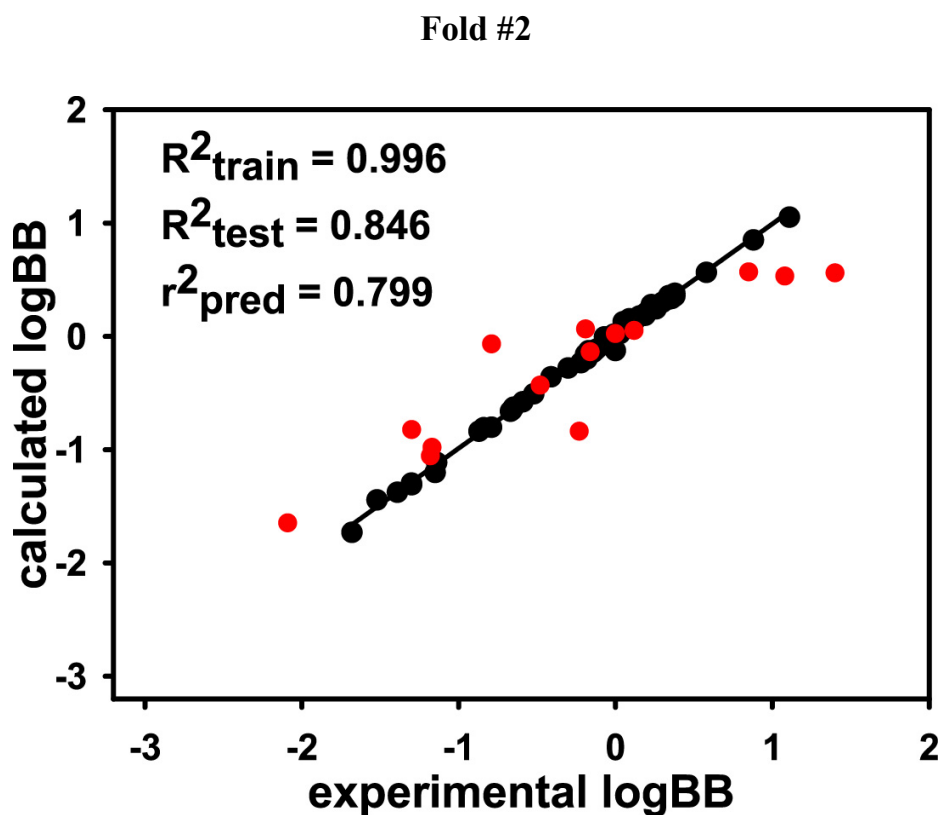

**Compounds in the training set:** 1207, 1486, 2022, 2083, 2164, 2284, 2473, 2554, 2578, 2803, 3394, 3608, 3672, 3676, 4064, 4158, 4421, 4737, 4828, 4909, 4914, 5064, 5193, 5206, 5838, 5842, 6468, 6473, 6623, 8942, 18047, 25255, 31423, 33039, 50599, 56051, 66994, 72138, 77870, 90274, 94957, 156391, 1497794, 3000715, 3034183, 3763607, 9837317, 10060538, 10377120, 10444765, 11777724, 12032949, 13071367, 14022509, 14840722, 23274095.

**Compounds in the test set:** 444, 2119, 3241, 4058, 4763, 5155, 6009, 24066, 65860, 451819, 6604200, 12889418, 21675832, 118753220.

**Figure S3.** Linear diagram showing correlation between the experimental and calculated LogBB values of the Subset 1 molecules in the training (black) and the test set (red).

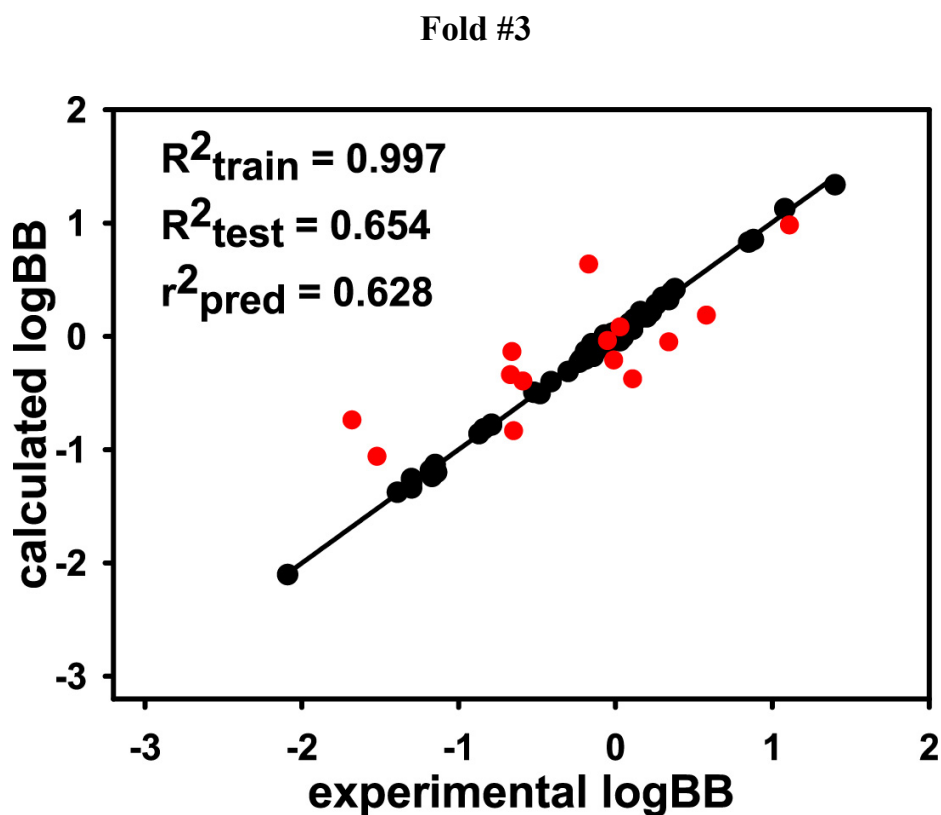

Compounds in the training set: 444, 1486, 2022, 2083, 2119, 2164, 2473, 2554, 2578, 2803, 3241, 3608, 3672, 3676, 4058, 4064, 4158, 4737, 4763, 4828, 4909, 4914, 5155, 5193, 5206, 5838, 5842, 6009, 6473, 6623, 8942, 24066, 25255, 31423, 50599, 56051, 65860, 66994, 77870, 90274, 156391, 451819, 1497794, 3000715, 3763607, 6604200, 9837317, 10060538, 10444765, 11777724, 12032949, 12889418, 14022509, 14840722, 21675832, 44214615, 118753220.

Compounds in the test set: 1207, 2284, 3394, 4421, 5064, 6468, 18047, 33039, 72138, 94957, 3034183, 10377120, 13071367, 23274095.

**Figure S4.** Linear diagram showing correlation between the experimental and calculated LogBB values of the Subset 2 molecules in the training (black) and the test set (red).

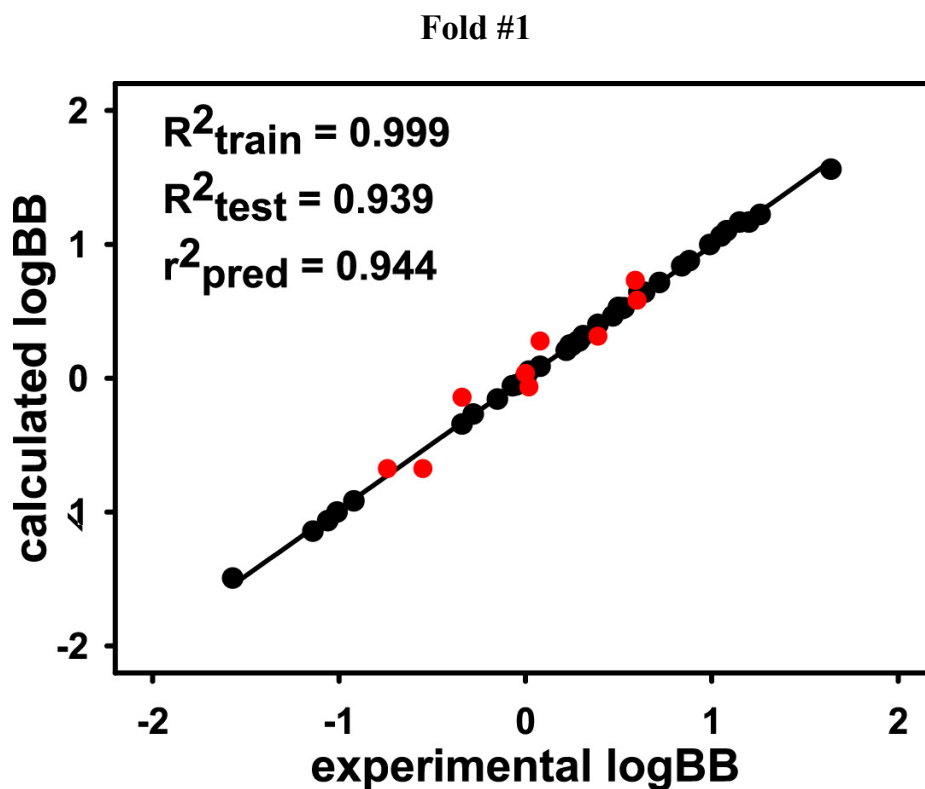

**Compounds in the training set:** 1775, 2249, 2756, 2995, 2997, 3100, 3162, 3878, 3918, 4171, 4184, 4205, 4463, 4946, 5092, 5095, 5253, 5505, 6086, 9034, 33741, 37614, 43473, 77991, 159642, 3034012, 5281708, 5359272, 6916184, 9796408, 10470115, 13755681, 14022511, 14577084, 14590445, 15524033, 19427054, 44383796, 70517986.

**Compounds in the test set:** 2555, 4631, 5726, 5983, 28315, 443371, 9861160, 44568616, 135458393.

**Figure S5.** Linear diagram showing correlation between the experimental and calculated LogBB values of the Subset 2 molecules in the training (black) and the test set (red).

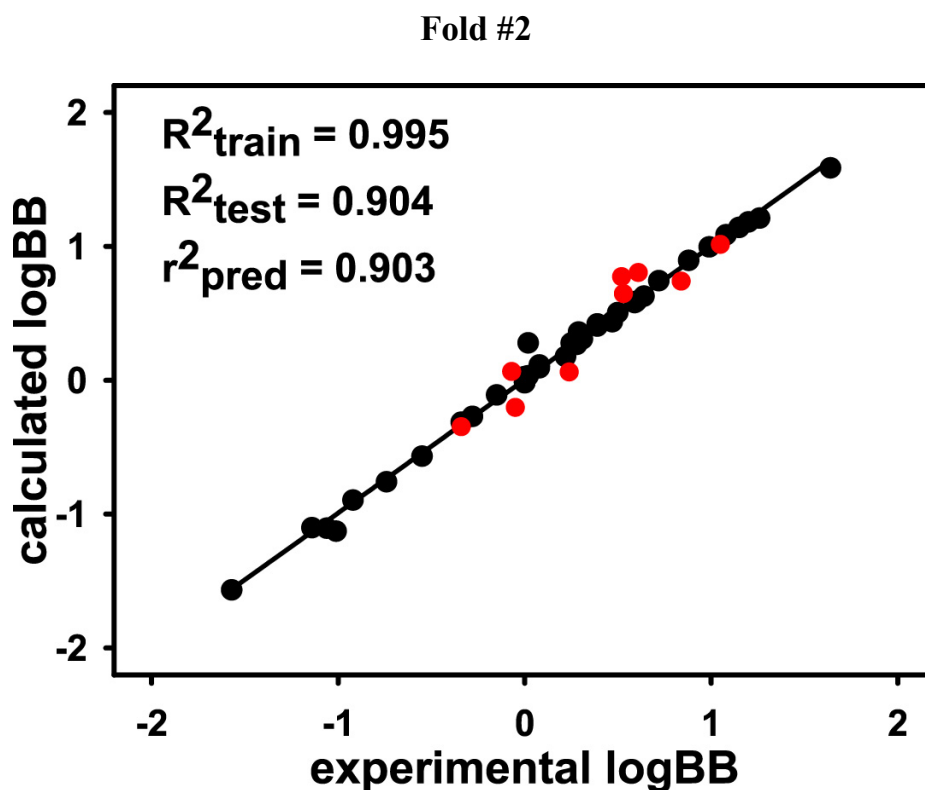

Compounds in the training set: 2249, 2555, 2756, 2995, 3100, 3162, 3878, 3918, 4171, 4184, 4463, 4631, 5095, 5253, 5505, 5726, 5983, 6086, 28315, 33741, 37614, 43473, 77991, 443371, 3034012, 5281708, 5359272, 6916184, 9796408, 9861160, 10470115, 14022511, 14577084, 14590445, 15524033, 19427054, 44383796, 44568616, 135458393.

Compounds in the test set: 1775, 2997, 4205, 4946, 5092, 9034, 159642, 13755681, 70517986.



**Figure S6.** Linear diagram showing correlation between the experimental and calculated LogBB values of the Subset 2 molecules in the training (black) and the test set (red).

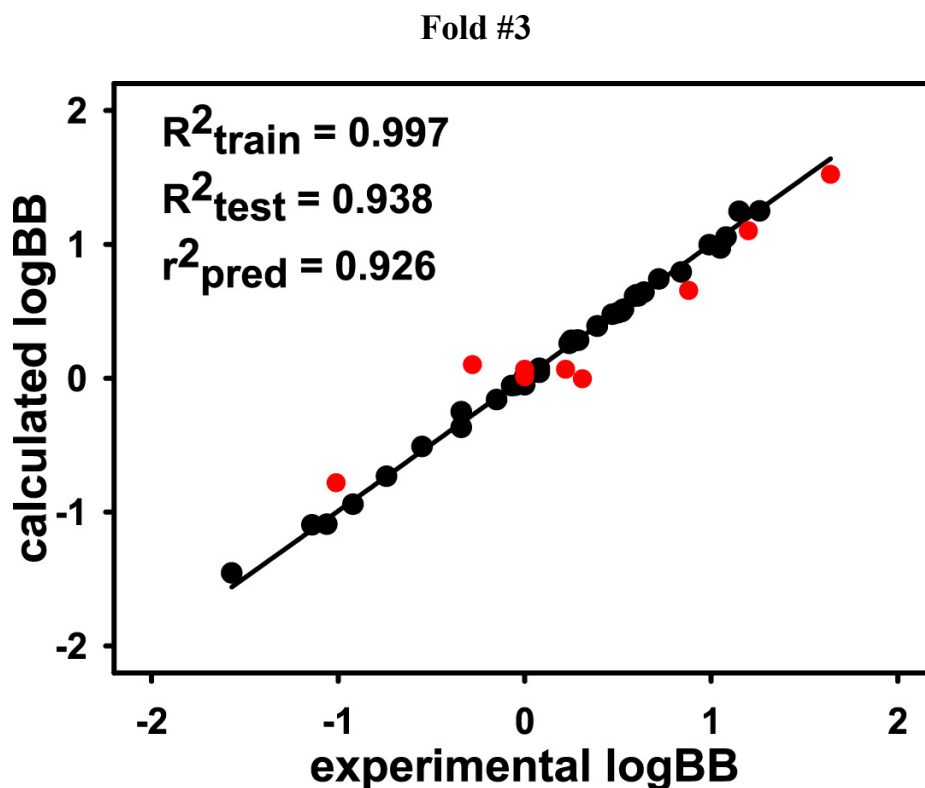

**Compounds in the training set:** 1775, 2249, 2555, 2756, 2995, 2997, 3100, 3162, 3878, 3918, 4171, 4184, 4205, 4463, 4631, 4946, 5092, 5095, 5726, 5983, 9034, 28315, 33741, 37614, 43473, 159642, 443371, 3034012, 5281708, 9861160, 10470115, 13755681, 14022511, 14577084, 14590445, 44383796, 44568616, 70517986, 135458393.

**Compounds in the test set:** 5253, 5505, 6086, 77991, 5359272, 6916184, 9796408, 15524033, 19427054.

**Figure S7.** Linear diagram showing correlation between the experimental and calculated LogBB values of the Subset 3 molecules in the training (black) and the test set (red).

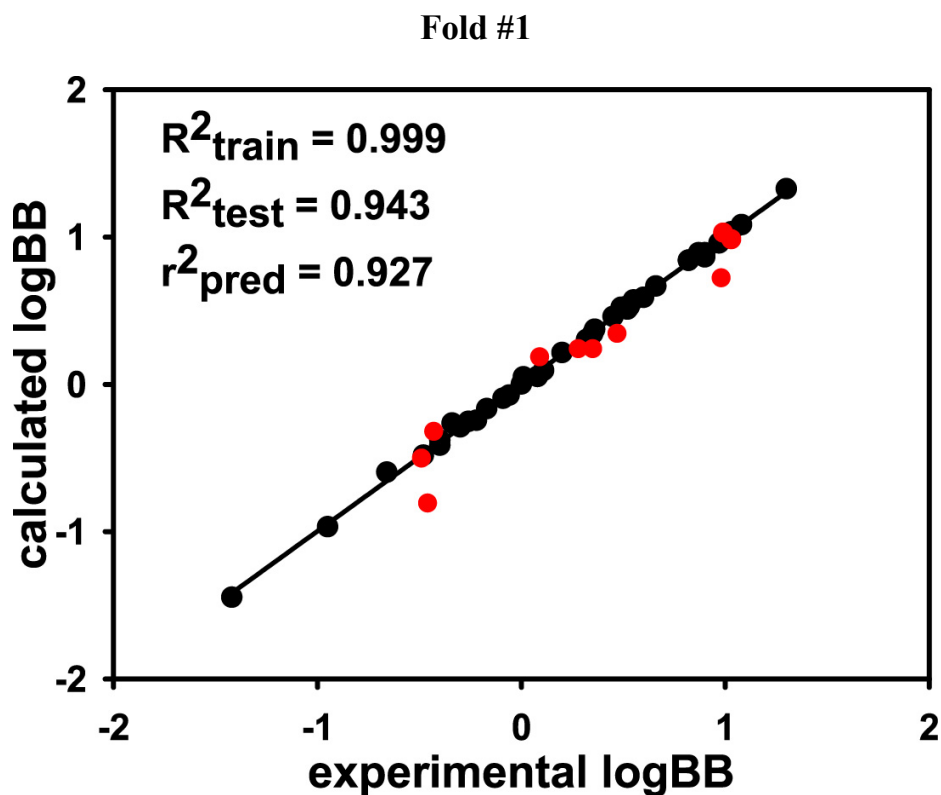

**Compounds in the training set:** 2160, 2583, 2789, 3158, 3308, 4011, 4168, 4616, 4736, 4911, 4926, 4992, 5358, 5402, 6013, 9651, 67101, 68778, 74981, 121249, 166560, 174174, 197322, 441300, 547559, 3035905, 5284371, 5284543, 5284604, 5288826, 9817839, 9839073, 9860946, 9903970, 10265481, 14022481, 18435769, 22154175, 29939457, 44568615.

**Compounds in the test set:** 3016, 3696, 4595, 5538, 5584, 89657, 133741, 163091, 346516, 9971484.

**Figure S8.** Linear diagram showing correlation between the experimental and calculated LogBB values of the Subset 3 molecules in the training (black) and the test set (red).

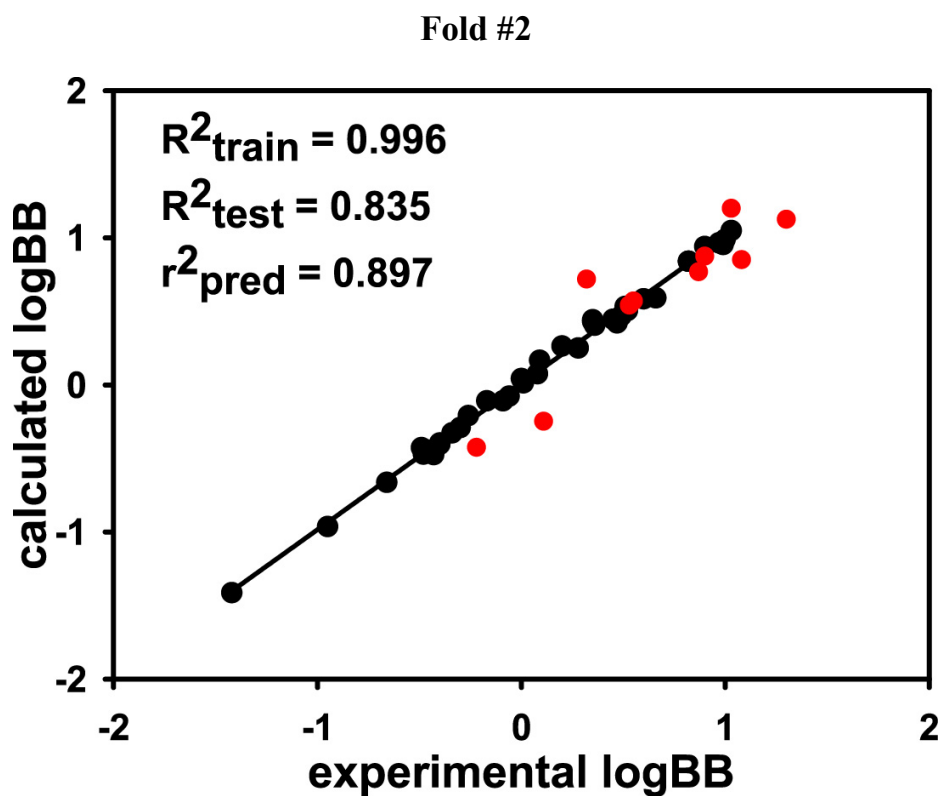

**Compounds in the training set:** 2583, 2789, 3016, 3158, 3308, 3696, 4168, 4595, 4616, 4736, 4911, 4992, 5358, 5402, 5538, 5584, 6013, 67101, 68778, 74981, 89657, 133741, 163091, 166560, 174174, 197322, 346516, 547559, 3035905, 5284371, 5284604, 5288826, 9839073, 9860946, 9971484, 10265481, 14022481, 22154175, 29939457, 44568615.

**Compounds in the test set:** 2160, 4011, 4926, 9651, 121249, 441300, 5284543, 9817839, 9903970, 18435769.

**Figure S9.** Linear diagram showing correlation between the experimental and calculated LogBB values of the Subset 3 molecules in the training (black) and the test set (red).

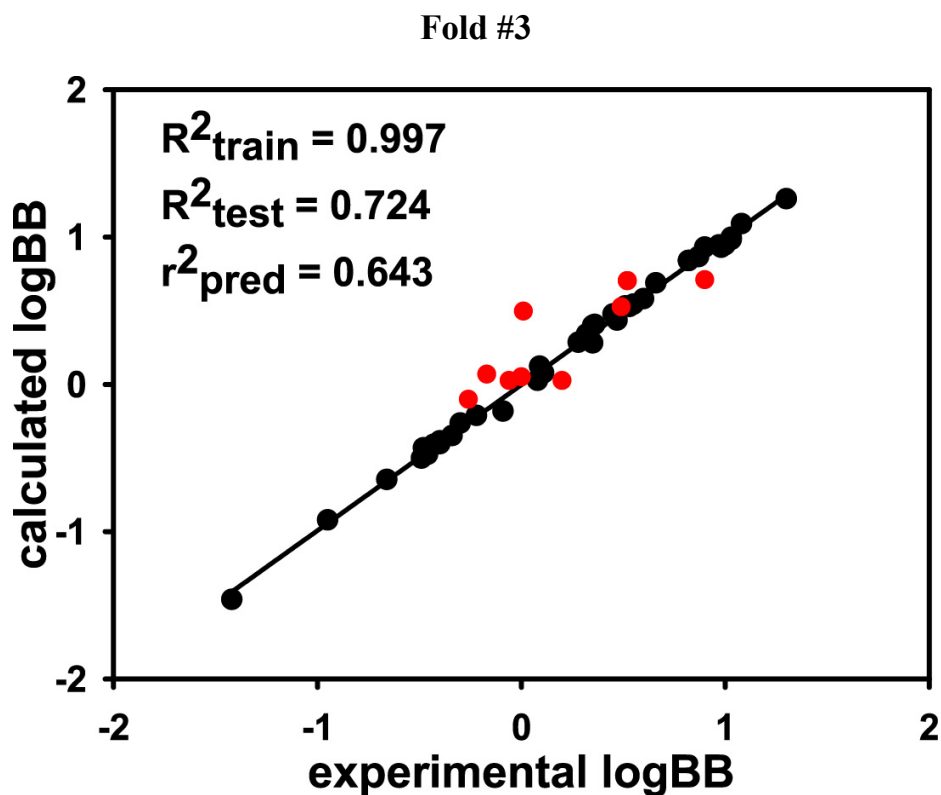

**Compounds in the training set:** 2160, 2789, 3016, 3158, 3308, 3696, 4011, 4595, 4616, 4736, 4911, 4926, 5358, 5402, 5538, 5584, 9651, 67101, 68778, 74981, 89657, 121249, 133741, 163091, 166560, 197322, 346516, 441300, 547559, 5284371, 5284543, 5284604, 9817839, 9839073, 9860946, 9903970, 9971484, 14022481, 18435769, 29939457.

**Compounds in the test set:** 2583, 4168, 4992, 6013, 174174, 3035905, 5288826, 10265481, 22154175, 44568615.

**Figure S10.** Linear diagram showing correlation between the experimental and calculated LogBB values of the Subset 4 molecules in the training (black) and the test set (red).

**Fold #1**

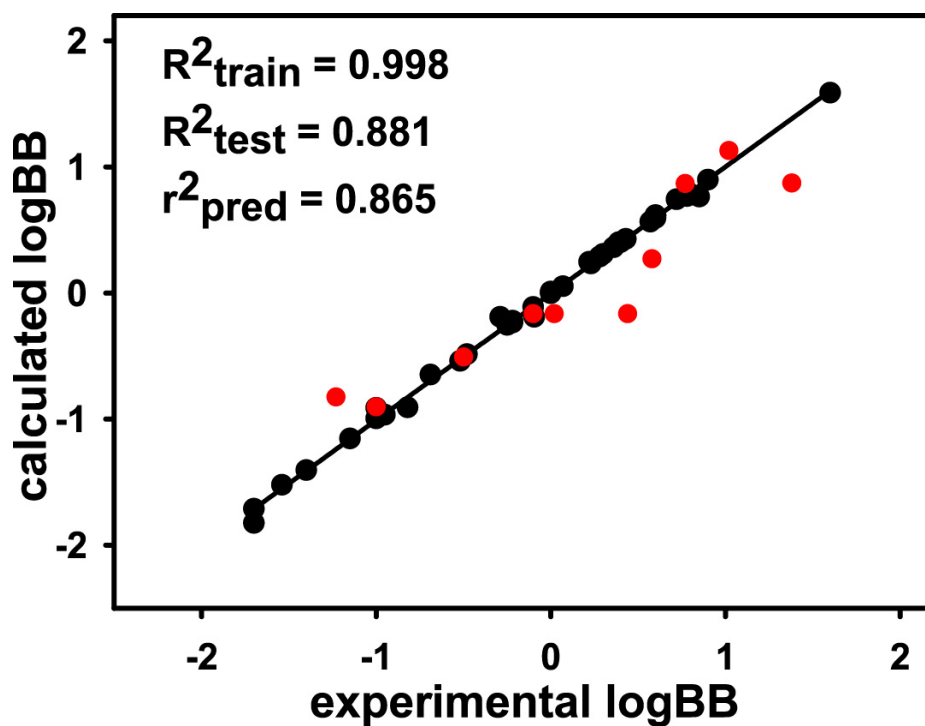

**Compounds in the training set:** 1223, 2170, 2369, 2381, 2708, 3365, 3373, 3380, 3386, 3510, 4095, 4539, 4781, 5090, 5184, 5732, 16078, 33014, 39147, 47811, 50287, 60652, 60949, 68617, 127382, 216236, 444008, 446220, 3000237, 5280343, 5284603, 5324346, 10063598, 11652375, 14022519, 25144104, 46888857, 54678486, 57395287, 135398745.

**Compounds in the test set:** 2118, 2726, 3958, 5994, 62875, 460612, 10358392, 15186924, 54429646, 57402315.

**Figure S11.** Linear diagram showing correlation between the experimental and calculated LogBB values of the Subset 4 molecules in the training (black) and the test set (red).

**Fold #2**

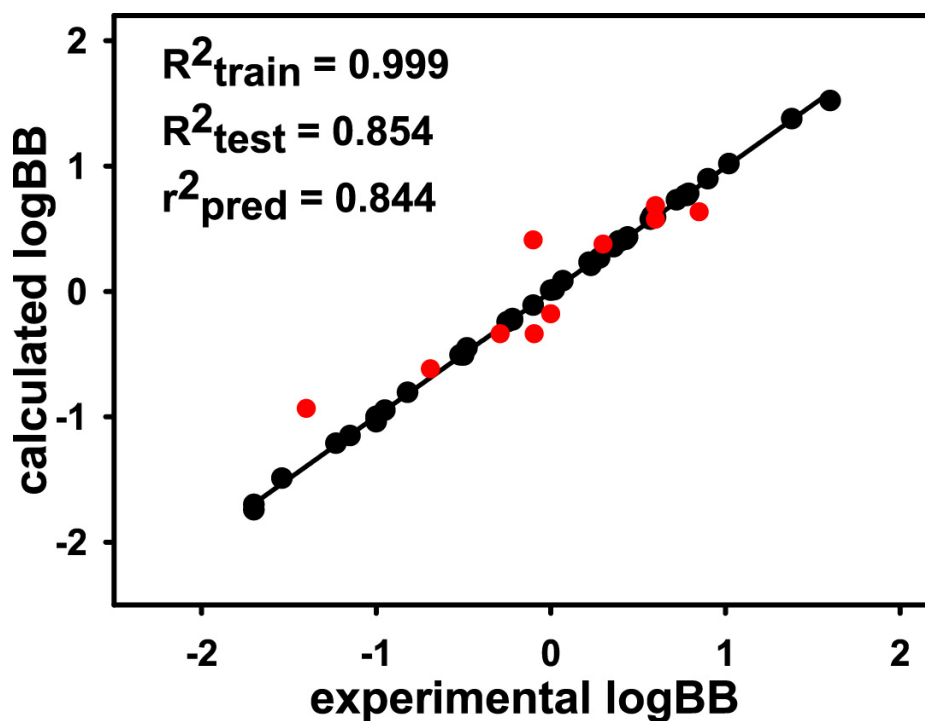

Compounds in the training set: 2170, 2369, 2708, 3365, 3380, 3386, 4095, 4539, 4781, 5184, 5732, 33014, 39147, 50287, 60652, 68617, 127382, 216236, 444008, 3000237, 5280343, 5284603, 5324346, 10063598, 14022519, 25144104, 46888857, 54678486, 57395287, 135398745, 2118, 2726, 3958, 5994, 62875, 460612, 10358392, 15186924, 54429646, 57402315.

Compounds in the test set: 1223, 2381, 3373, 3510, 5090, 16078, 47811, 60949, 446220, 11652375.

**Figure S12.** Linear diagram showing correlation between the experimental and calculated LogBB values of the Subset 4 molecules in the training (black) and the test set (red).

**Fold #3**

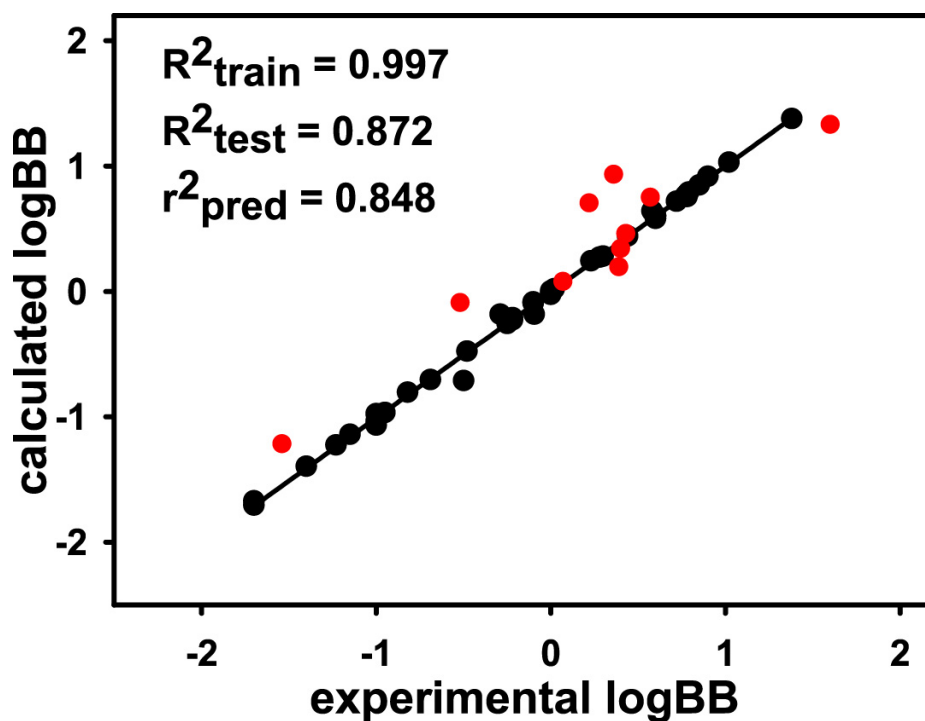

Compounds in the training set: 1223, 2118, 2170, 2381, 2708, 2726, 3365, 3373, 3386, 3510, 3958, 4095, 4539, 5090, 5184, 5732, 5994, 16078, 39147, 47811, 50287, 60652, 60949, 62875, 127382, 216236, 446220, 460612, 3000237, 5280343, 5324346, 10063598, 10358392, 11652375, 15186924, 25144104, 54429646, 54678486, 57402315, 135398745.

Compounds in the test set: 2369, 3380, 4781, 33014, 68617, 444008, 5284603, 14022519, 46888857, 57395287.

**Figure S13.** Linear diagram showing correlation between the experimental and calculated LogBB values of the Subset 5 molecules in the training (black) and the test set (red).

**Fold #1**

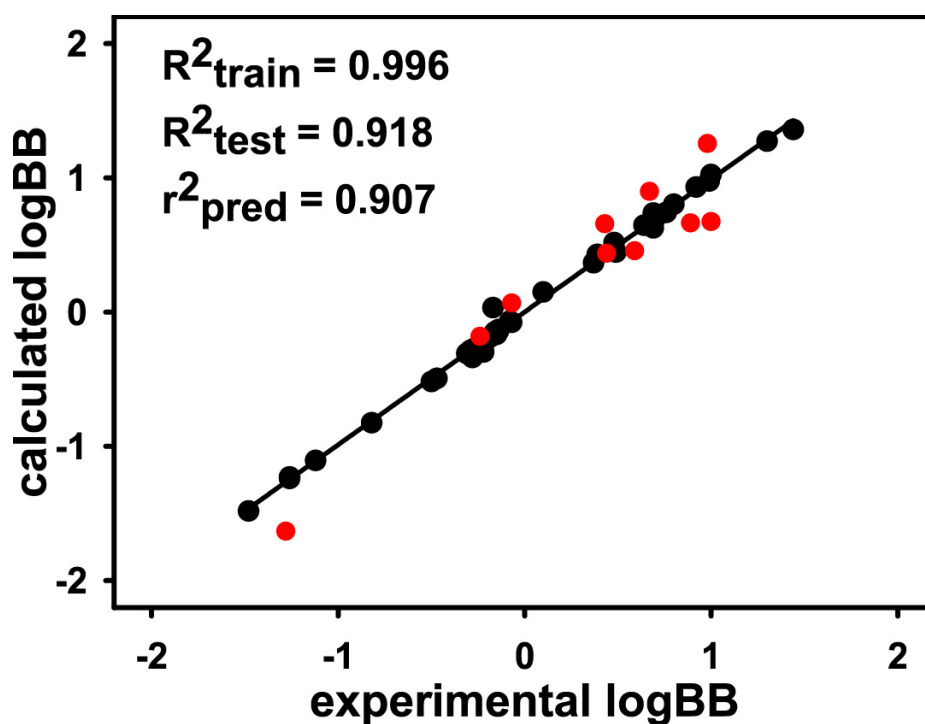

**Compounds in the training set:** 1345, 1978, 2771, 3715, 3964, 4192, 4594, 5009, 5568, 5755, 5953, 24360, 51081, 107917, 114376, 124449, 126761, 129710, 182017, 192706, 256277, 969488, 6426759, 9902443, 10019237, 10088796, 10245719, 10404144, 10937291, 11110698, 11530404, 13646638, 14022486, 14022491, 15186911, 22620080, 44213642, 46842852, 53394319, 135398737.

**Compounds in the test set:** 3345, 5556, 83909, 162244, 5284627, 10498206, 11559235, 14022497, 44433393, 57397056.

**Figure S14.** Linear diagram showing correlation between the experimental and calculated LogBB values of the Subset 5 molecules in the training (black) and the test set (red).

**Fold #2**



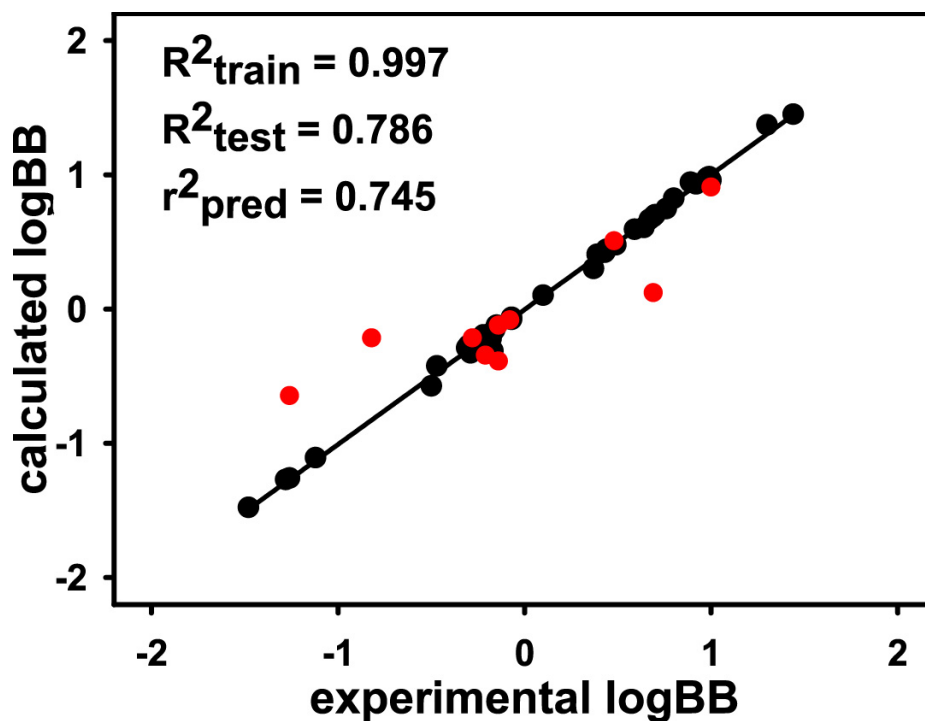

Compounds in the training set: 1978, 2771, 3345, 3964, 4192, 5009, 5556, 5568, 5755, 24360, 51081, 83909, 114376, 124449, 129710, 162244, 182017, 256277, 969488, 5284627, 9902443, 10019237, 10088796, 10404144, 10498206, 10937291, 11110698, 11530404, 11559235, 13646638, 14022491, 14022497, 15186911, 22620080, 44213642, 44433393, 46842852, 53394319, 57397056, 135398737.

Compounds in the test set: 1345, 3715, 4594, 5953, 107917, 126761, 192706, 6426759, 10245719, 14022486.

**Figure S15.** Linear diagram showing correlation between the experimental and calculated LogBB values of the Subset 5 molecules in the training (black) and the test set (red).

**Fold #3**

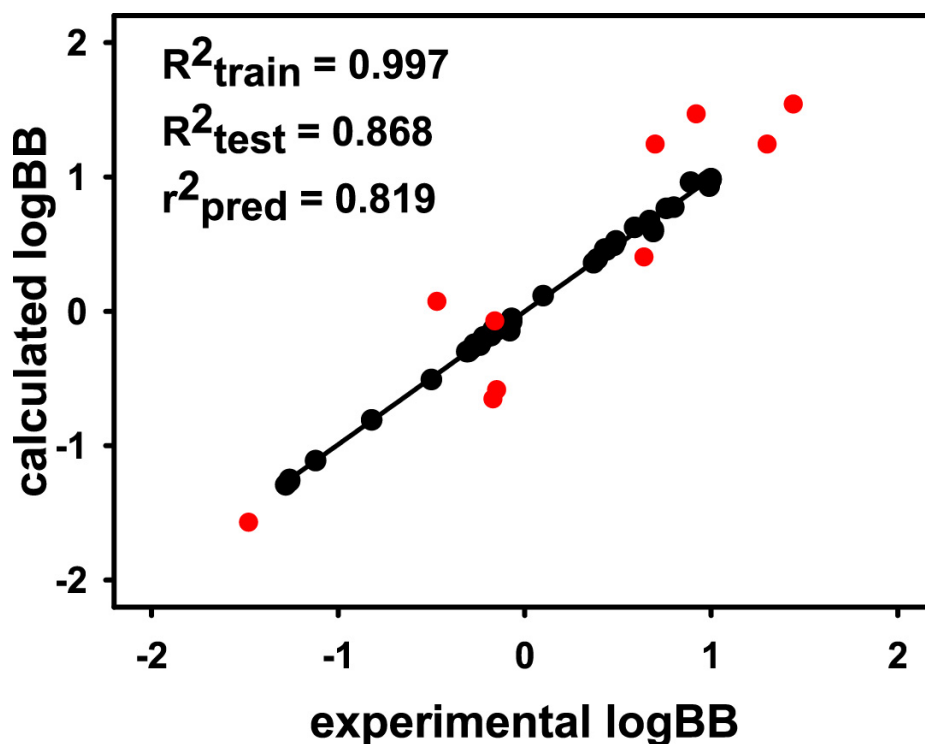

**Compounds in the training set:** 1345, 2771, 3345, 3715, 3964, 4192, 4594, 5009, 5556, 5755, 5953, 24360, 83909, 107917, 114376, 124449, 126761, 129710, 162244, 192706, 256277, 969488, 5284627, 6426759, 10019237, 10088796, 10245719, 10498206, 10937291, 11110698, 11559235, 13646638, 14022486, 14022491, 14022497, 22620080, 44213642, 44433393, 53394319, 57397056.

**Compounds in the test set:** 1978, 5568, 51081, 182017, 9902443, 10404144, 11530404, 15186911, 46842852, 135398737.

**Figure S16.** Linear diagram showing correlation between the experimental and calculated LogBB values of the Subset 6 molecules in the training (black) and the test set (red).

**Fold #1**

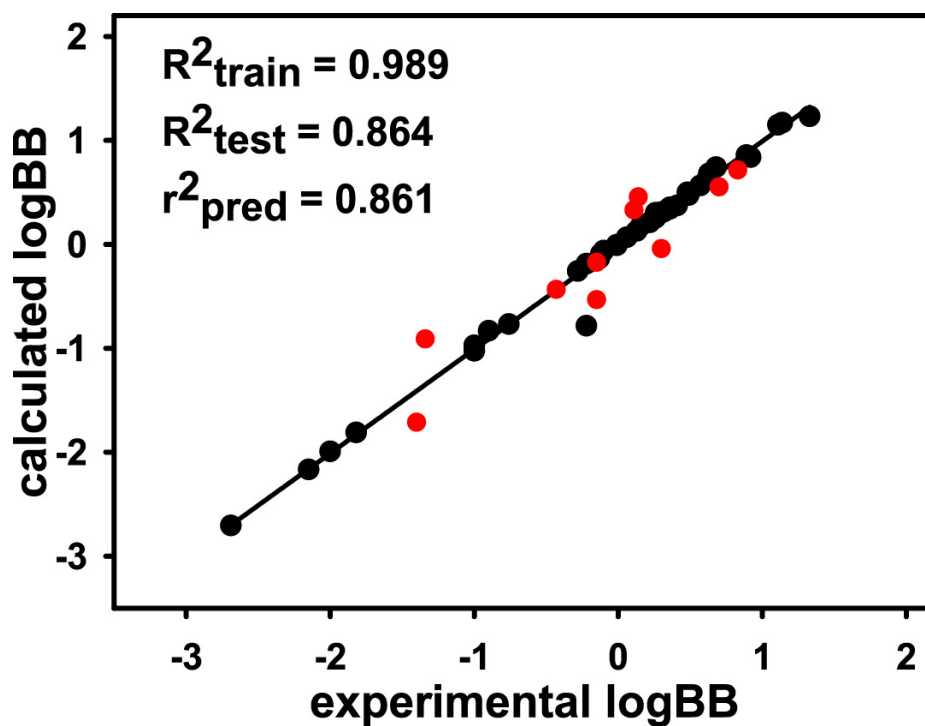

**Compounds in the training set:** 2477, 2678, 3152, 3559, 3658, 4046, 4078, 4893, 5265, 5339, 5452, 5533, 5754, 60464, 72108, 149096, 198752, 204104, 2733526, 3025986, 3052762, 5362391, 6604009, 9821217, 9821511, 9864647, 9907401, 9907628, 9907851, 10091748, 11003252, 11502034, 11531010, 11545677, 14022483, 14022499, 22620050, 22620062, 22620085, 45272895.

**Compounds in the test set:** 3357, 5002, 5743, 91769, 3946663, 9864646, 10384745, 11653882, 19696721, 22620075.

**Figure S17.** Linear diagram showing correlation between the experimental and calculated LogBB values of the Subset 6 molecules in the training (black) and the test set (red).

**Fold #2**

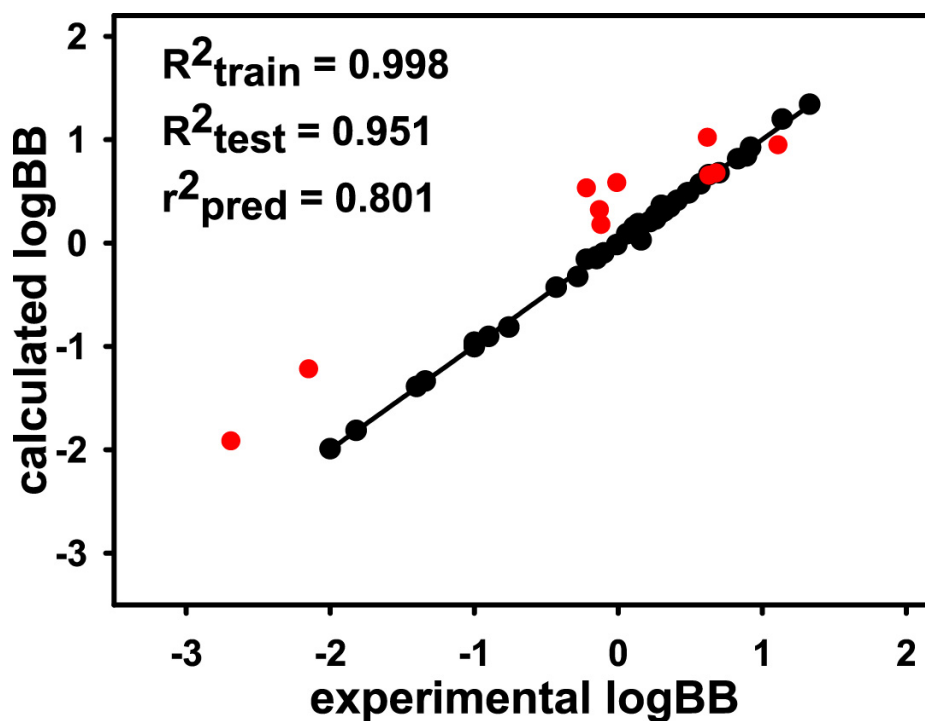

**Compounds in the training set:** 2477, 3152, 3357, 3559, 3658, 4078, 4893, 5002, 5265, 5452, 5533, 5743, 60464, 72108, 91769, 149096, 198752, 2733526, 3025986, 3052762, 3946663, 5362391, 6604009, 9821511, 9864646, 9864647, 9907401, 9907851, 10091748, 10384745, 11003252, 11531010, 11545677, 11653882, 14022499, 19696721, 22620050, 22620062, 22620075, 45272895.

**Compounds in the test set:** 2678, 4046, 5339, 5754, 204104, 9821217, 9907628, 11502034, 14022483, 22620085.

**Figure S18.** Linear diagram showing correlation between the experimental and calculated LogBB values of the Subset 6 molecules in the training (black) and the test set (red).

**Fold #3**

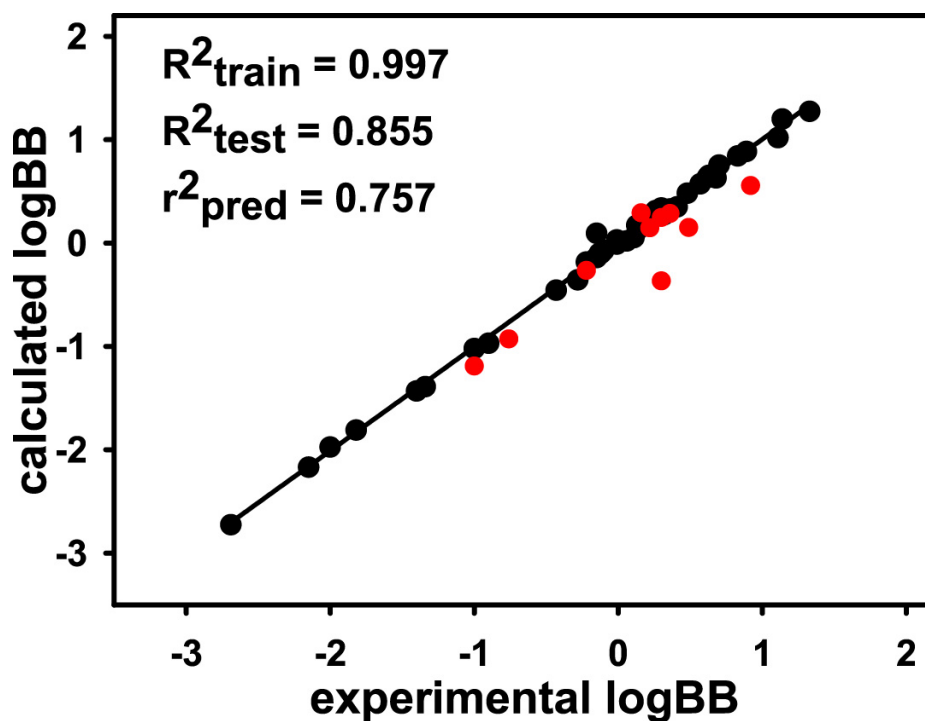

**Compounds in the training set:** 2678, 3152, 3357, 3559, 4046, 4078, 4893, 5002, 5265, 5339, 5452, 5743, 5754, 60464, 72108, 91769, 198752, 204104, 3025986, 3052762, 3946663, 5362391, 9821217, 9821511, 9864646, 9864647, 9907628, 9907851, 10091748, 10384745, 11502034, 11531010, 11545677, 11653882, 14022483, 19696721, 22620050, 22620075, 22620085, 45272895.

**Compounds in the test set:** 2477, 3658, 5533, 149096, 2733526, 6604009, 9907401, 11003252, 14022499, 22620062.

**Figure S19.** Linear diagram showing correlation between the experimental and calculated LogBB values of the Subset 7 molecules in the training (black) and the test set (red).

**Fold #1**

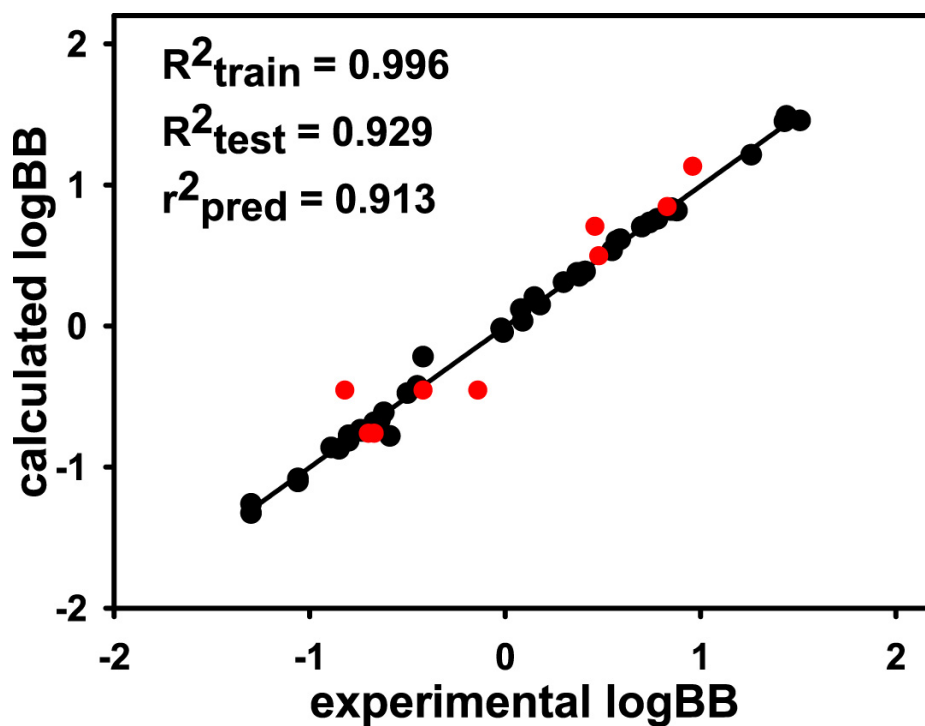

**Compounds in the training set:** 3151, 3372, 4497, 4748, 5073, 5566, 6167, 31765, 39186, 51263, 51671, 53232, 57347, 59823, 60700, 65998, 71301, 104972, 115237, 123631, 441667, 444031, 456389, 4375468, 5316673, 6603915, 9846311, 9866153, 9931510, 10201984, 10388384, 10884606, 13497176, 14022484, 14022522, 21440942, 22620066, 22620091, 44416780, 70691333.

**Compounds in the test set:** 12598, 54385, 64761, 119146, 475100, 9909299, 11531660, 19696654, 44592215.

**Figure S20.** Linear diagram showing correlation between the experimental and calculated LogBB values of the Subset 7 molecules in the training (black) and the test set (red).

**Fold #2**

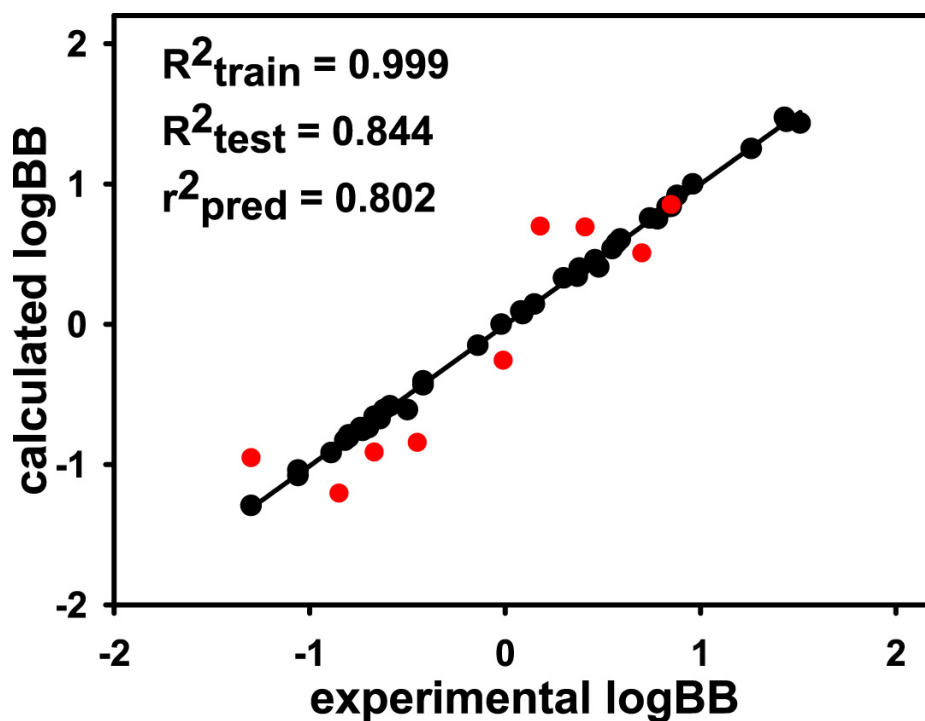

Compounds in the training set: 3372, 4497, 5073, 5566, 6167, 12598, 39186, 51263, 51671, 53232, 54385, 59823, 60700, 64761, 65998, 71301, 104972, 119146, 123631, 441667, 444031, 475100, 4375468, 5316673, 6603915, 9846311, 9909299, 9931510, 10201984, 10388384, 10884606, 11531660, 14022484, 14022522, 19696654, 21440942, 22620066, 44416780, 44592215, 70691333.

Compounds in the test set: 3151, 4748, 31765, 57347, 115237, 456389, 9866153, 13497176, 22620091.

**Figure S21.** Linear diagram showing correlation between the experimental and calculated LogBB values of the Subset 7 molecules in the training (black) and the test set (red).

**Fold #3**

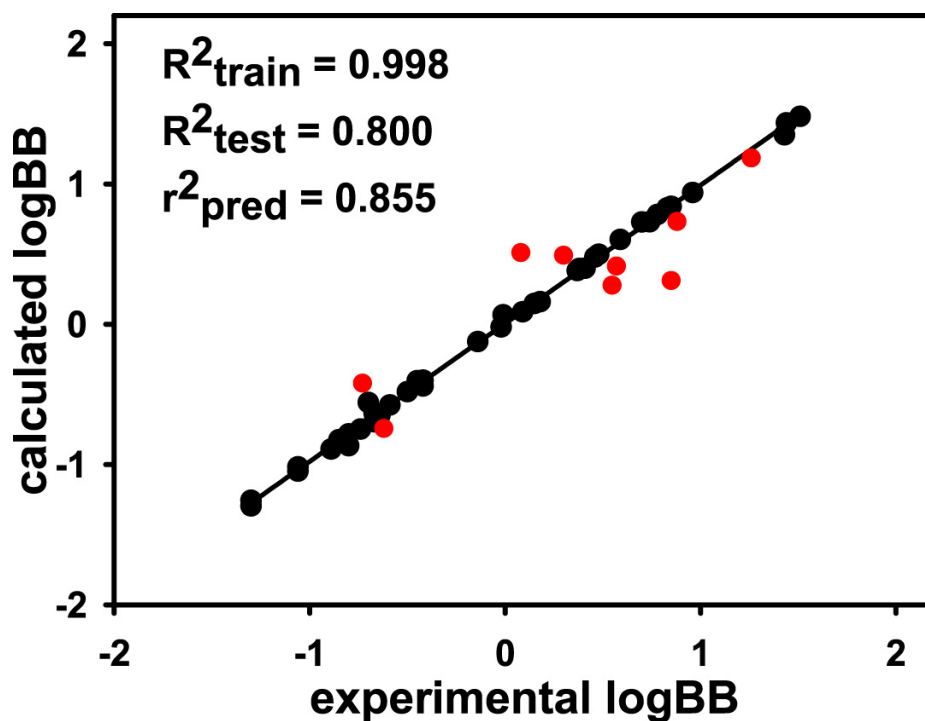

Compounds in the training set: 3151, 3372, 4748, 5073, 5566, 6167, 12598, 31765, 51263, 51671, 54385, 57347, 59823, 60700, 64761, 65998, 104972, 115237, 119146, 123631, 441667, 456389, 475100, 4375468, 6603915, 9846311, 9866153, 9909299, 9931510, 10388384, 10884606, 11531660, 13497176, 14022522, 19696654, 21440942, 22620091, 44416780, 44592215, 70691333.

Compounds in the test set: 4497, 39186, 53232, 71301, 444031, 5316673, 10201984, 14022484, 22620066.

**Figure S22.** Linear diagram showing correlation between the experimental and calculated LogBB values of the Subset 8 molecules in the training (black) and the test set (red).

**Fold #1**



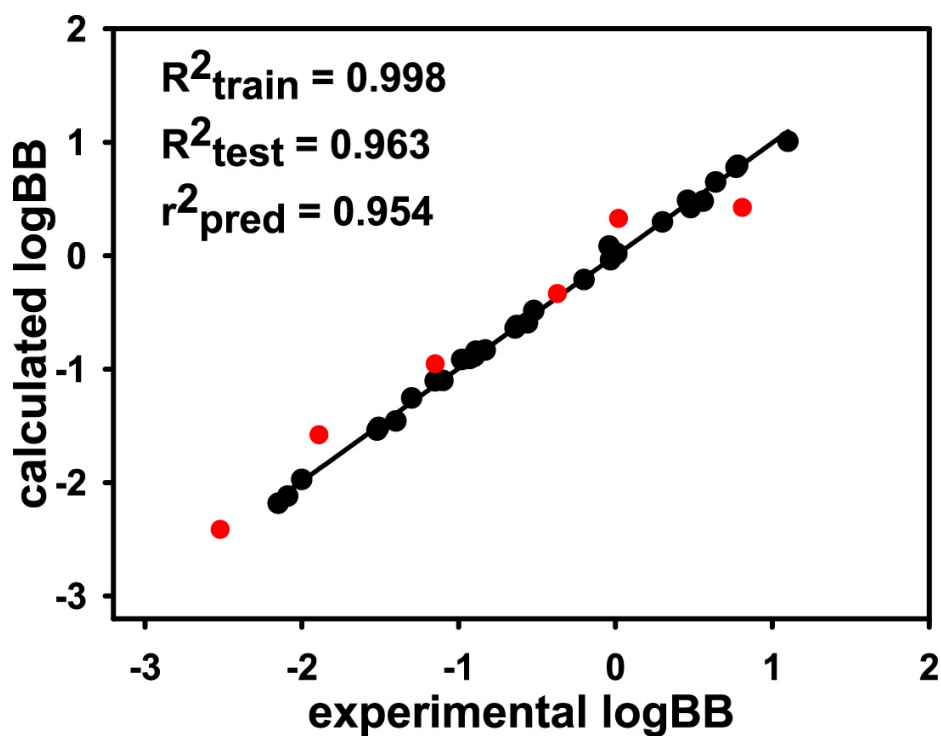

Compounds in the training set: 2247, 2520, 3108, 3230, 3310, 3348, 3488, 3823, 3955, 4112, 5405, 5625, 8223, 31703, 42890, 64143, 65016, 208908, 446156, 5484731, 6426129, 6426143, 6917994, 9806182, 9826520, 9847115, 9916104, 10028436, 11775399, 17905241, 54675783, 57390958.

Compounds in the test set: 47499, 53025, 343473, 19696689, 24894028, 73226213.

**Figure S23.** Linear diagram showing correlation between the experimental and calculated LogBB values of the Subset 8 molecules in the training (black) and the test set (red).

**Fold #2**

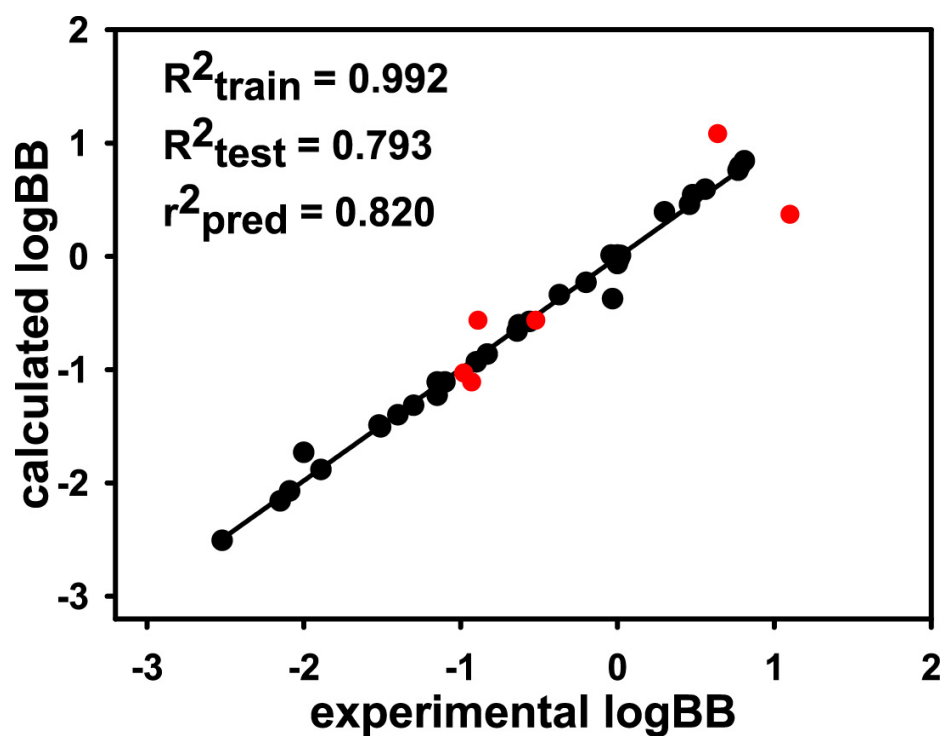

Compounds in the training set: 2520, 3108, 3230, 3310, 3488, 3823, 3955, 4112, 5625, 8223, 31703, 42890, 47499, 53025, 65016, 208908, 343473, 446156, 5484731, 6426143, 6917994, 9806182, 9826520, 9847115, 9916104, 10028436, 11775399, 17905241, 19696689, 24894028, 57390958, 73226213.

Compounds in the test set: 2247, 3348, 5405, 64143, 6426129, 54675783.

**Figure S24.** Linear diagram showing correlation between the experimental and calculated LogBB values of the Subset 8 molecules in the training (black) and the test set (red).

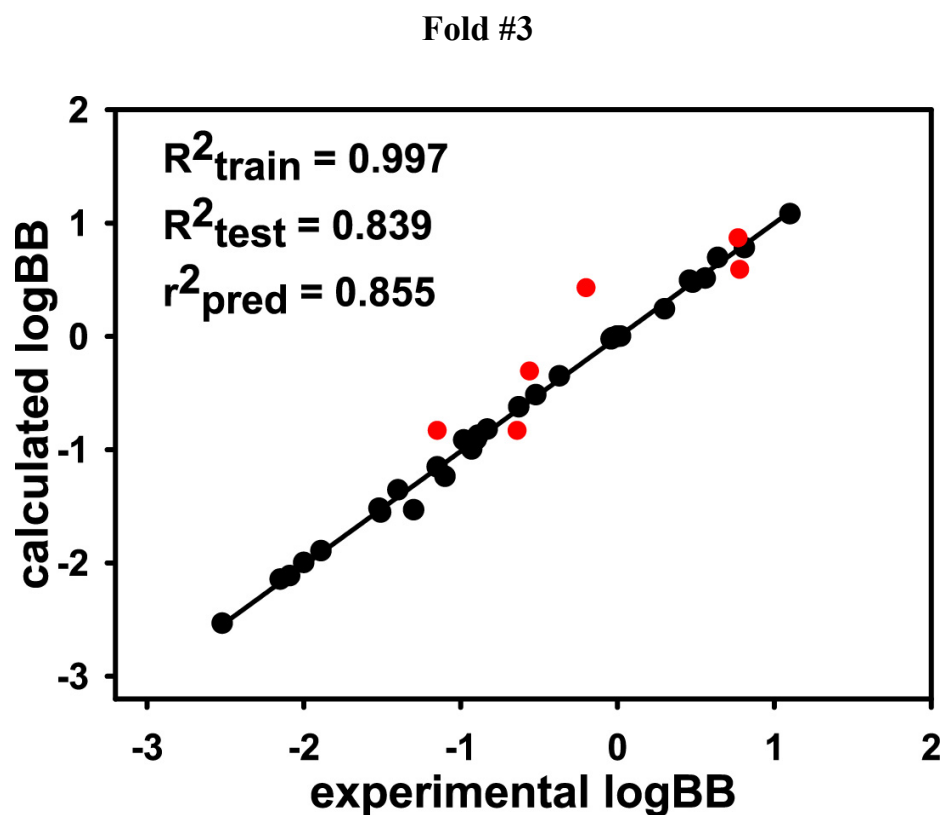

Compounds in the training set: 2247, 3108, 3230, 3310, 3348, 3488, 3823, 4112, 5405, 5625, 8223, 31703, 42890, 47499, 53025, 64143, 208908, 343473, 446156, 5484731, 6426129, 6426143, 6917994, 9806182, 9847115, 9916104, 10028436, 17905241, 19696689, 24894028, 54675783, 73226213.

Compounds in the test set: 2520, 3955, 65016, 9826520, 11775399, 57390958.
